# Supplementary material for: Comparison of lipid accumulation product and body mass index as indicators of diabetes diagnosis among 215,651 Chinese adults
Source: PeerJ. 2020 Feb 10;8:e8483. doi: 10.7717/peerj.8483 (PMC7017788; doi:10.7717/peerj.8483)
Supplement: Supplemental Information 1 [file peerj-08-8483-s001.xlsx]

## Sheet: VAILAP0916
ID	sex	age(year)	education	height(cm)	weight(kg)	waist(cm)	body mass index	smoke	fasting blood glucose（mmol/L）	triglyceride（mmol/L）	high-density lipoprotein cholesterol(mmol/L)	t2dm
1	male	41	primary school	173	62	85	20.72	current smokers	5.6	0.52	1.27	no
2	male	42	junior high school	174	75	88	24.77	non-smokers	5.1	0.68	1.58	no
3	male	69	primary school	171	75	92	25.65	non-smokers	5	1.22	0.91	no
4	male	21	university or higher	190	81	76	22.44	non-smokers	5.4	0.89	0.93	no
5	male	28	senior high school	174	75	81	24.77	current smokers	6	1.21	1.02	no
6	male	29	junior high school	164	66	81	24.54	current smokers	4.4	0.6	1.33	no
7	male	58	primary school	159	67	91	26.5	non-smokers	5	0.67	1.26	no
8	male	54	junior high school	163	82	106	30.86	non-smokers	5.9	0.84	1.25	no
9	male	59	senior high school	170	78	97	26.99	current smokers	5.6	1.18	1.05	no
10	male	85	illiteracy	170	72	86	24.91	previous smokers	6.5	1.87	0.95	no
11	male	44	primary school	164	53	80	19.71	current smokers	3.5	0.89	1.32	no
12	male	62	primary school	167	56	71	20.08	non-smokers	5.3	0.56	1.46	no
13	male	34	junior high school	188	60	68	16.98	non-smokers	5.3	1.37	1.33	no
14	male	38	junior high school	166	63	87	22.86	non-smokers	5.1	3.6	0.84	no
15	male	60	primary school	178	85	90	26.83	non-smokers	5	8.6	0.8	no
16	male	65	primary school	169	88	100	30.81	non-smokers	7.1	2.47	0.8	no
17	male	54	senior high school	177	73	84	23.3	non-smokers	5.7	1.33	1.36	no
18	male	49	primary school	164	70	89	26.03	current smokers	4.8	2.34	1.2	no
19	male	74	primary school	162	60	74	22.86	non-smokers	5.9	0.85	1.41	no
20	male	31	primary school	175	65	76	21.22	current smokers	5.5	0.85	1.58	no
21	male	38	junior high school	173	82	94	27.4	non-smokers	5.7	3.82	0.59	no
22	male	70	junior high school	174	81	95	26.75	non-smokers	5	1.52	0.72	no
23	male	53	senior high school	177	90	107	28.73	current smokers	5.1	2.48	1.14	no
24	male	58	junior high school	167	63	82	22.59	previous smokers	5	1.18	1.18	no
25	male	57	primary school	172	72	84	24.34	current smokers	5.3	0.72	1.38	no
26	male	52	junior high school	178	74	80	23.36	current smokers	5.1	1.67	1.46	no
27	male	49	primary school	176	73	94	23.57	current smokers	5.9	1.13	1.57	no
28	male	40	primary school	178	93	103	29.35	current smokers	5.1	0.91	1.24	no
29	male	38	junior high school	177	102	112	32.56	non-smokers	5	2.88	1.61	no
30	male	45	junior high school	166	59	77	21.41	non-smokers	5.7	1.89	1.05	no
31	male	46	primary school	172	74	87	25.01	current smokers	4.99	0.85	1.15	no
32	male	58	junior high school	169	74	94	25.91	non-smokers	5.1	3.86	0.98	no
33	male	47	junior high school	170	99	104	34.26	current smokers	4.13	1.19	1.33	no
34	male	19	senior high school	180	77	84	23.77	non-smokers	5	0.9	1.16	no
35	male	37	senior high school	165	85	102	31.22	current smokers	5.1	3.05	0.92	no
36	male	31	senior high school	177	77	82	24.58	non-smokers	5.1	1.45	1.28	no
37	male	26	junior high school	172	88	92	29.75	non-smokers	5.1	1.13	1.16	no
38	male	26	senior high school	171	76	98	25.99	current smokers	4.4	4.42	1.25	no
39	male	39	senior high school	170	87	97	30.1	non-smokers	4.5	2.93	1.76	no
40	male	49	illiteracy	177	80	83	25.54	non-smokers	5.7	0.65	1.14	no
41	male	31	junior high school	178	77	84	24.3	non-smokers	5.6	0.57	1.11	no
42	male	27	illiteracy	170	60	93	20.76	non-smokers	4.5	0.69	1.01	no
43	male	38	junior high school	170	80	90	27.68	non-smokers	5.2	1.07	0.97	no
44	male	24	unspecified	184	71	77	20.97	current smokers	4.8	1.3	1.38	no
45	male	58	junior high school	171	68	89	23.26	current smokers	5.8	1.55	1.24	no
46	male	46	junior high school	161	52	72	20.06	non-smokers	4.1	0.43	1.99	no
47	male	35	junior high school	174	62	78	20.48	non-smokers	4.3	0.62	1.92	no
48	male	82	unspecified	169	71	92	24.86	non-smokers	4.3	1.28	1.17	no
49	male	39	junior high school	173	80	98	26.73	current smokers	5.7	2.65	0.96	no
50	male	39	junior high school	174	75	85	24.77	current smokers	4.3	1.46	1.28	no
51	male	37	senior high school	166	75	92	27.22	current smokers	6	1.67	1.12	no
52	male	33	primary school	153	69	86	29.48	non-smokers	5.73	0.46	1.53	no
53	male	52	junior high school	166	59	74	21.41	previous smokers	6	2.84	2.17	no
54	male	30	junior high school	181	86	92	26.25	current smokers	4.9	2.51	0.98	no
55	male	25	university or higher	172	59	76	19.94	non-smokers	4.5	2.34	0.87	no
56	male	53	junior high school	178	74	91	23.36	current smokers	5.7	1.67	1.23	no
57	male	56	senior high school	172	77	95	26.03	current smokers	5.6	1.46	0.96	no
58	male	43	primary school	179	83	99	25.9	non-smokers	4.9	0.73	1.53	no
59	male	36	primary school	179	77	80	24.03	non-smokers	5.4	1.18	1.04	no
60	male	59	primary school	175	70	89	22.86	non-smokers	4.1	0.74	1.26	no
61	male	52	junior high school	180	95	107	29.32	current smokers	4.8	2.8	1.24	no
62	male	68	primary school	165	59	80	21.67	current smokers	5.2	1.02	1.17	no
63	male	64	junior high school	165	62	81	22.77	current smokers	5.4	0.87	2.15	no
64	male	71	junior high school	177	88	111	28.09	previous smokers	6	0.82	0.99	no
65	male	72	illiteracy	160	93	90	36.33	non-smokers	3.6	1.6	1.24	no
66	male	29	junior high school	175	64	77	20.9	non-smokers	5.8	0.34	1.36	no
67	male	30	junior high school	163	58.5	75	22.02	current smokers	4.4	1.44	0.79	no
68	male	50	junior high school	168	64	90	22.68	non-smokers	5.1	1.47	1.4	no
69	male	60	primary school	149	60	87	27.03	non-smokers	4.7	1.29	1.42	no
70	male	47	junior high school	174	76	95	25.1	current smokers	5.1	1.69	0.97	no
71	male	56	junior high school	166	67	88	24.31	previous smokers	3.9	1.05	1.38	no
72	male	50	primary school	164	77	102	28.63	non-smokers	4.4	1.61	2.73	no
73	male	61	junior high school	170	67	88	23.18	non-smokers	4.1	1.24	1.02	no
74	male	42	junior high school	172	76	93	25.69	current smokers	5.3	4.57	0.93	no
75	male	82	primary school	168	79	82	27.99	non-smokers	5.3	1.14	0.96	no
76	male	51	senior high school	169	88	102	30.81	non-smokers	5	2.17	0.99	no
77	male	41	primary school	172.5	67.5	76	22.68	current smokers	3.9	1.19	1.42	no
78	male	42	senior high school	166	86	112	31.21	non-smokers	4.4	7.97	1.24	no
79	male	34	senior high school	171	82	91	28.04	current smokers	4.4	1.94	1.89	no
80	male	25	senior high school	179	77	82	24.03	current smokers	5.1	1.54	0.79	no
81	male	62	primary school	176	89	90	28.73	non-smokers	3.7	1.9	0.89	no
82	male	58	junior high school	175	81	100	26.45	current smokers	5.5	1.38	1.42	no
83	male	34	primary school	166	80	100	29.03	non-smokers	4	1.34	0.96	no
84	male	58	senior high school	172	74	93	25.01	current smokers	5.4	1.19	1.12	no
85	male	51	junior high school	169	84	106	29.41	non-smokers	5.5	0.87	1.24	no
86	male	51	primary school	169	75	101	26.26	non-smokers	5.6	1.32	1.35	no
87	male	81	primary school	169	63	73	22.06	non-smokers	4.2	1.69	1.33	no
88	male	51	senior high school	173	80	79	26.73	non-smokers	5.7	2.15	1	no
89	male	45	junior high school	166	65	82	23.59	non-smokers	4.7	1.76	0.99	no
90	male	53	junior high school	169	79	92	27.66	non-smokers	5.7	4.12	1.04	no
91	male	37	junior high school	169	86	104	30.11	non-smokers	5.7	1.15	1.04	no
92	male	45	junior high school	166	67	98	24.31	non-smokers	5.1	0.9	1.22	no
93	male	49	junior high school	157	66	78	26.78	non-smokers	3.7	0.81	0.07	no
94	male	66	primary school	163	65	84	24.46	previous smokers	4.9	0.56	1.16	no
95	male	30	junior high school	178	72	81	22.72	current smokers	5.1	0.82	1.3	no
96	male	69	primary school	160	64	86	25	non-smokers	7.1	0.84	1.3	no
97	male	27	senior high school	182	71	81	21.43	current smokers	5.3	0.79	1.48	no
98	male	34	primary school	179	77	84	24.03	non-smokers	4.8	0.77	1.15	no
99	male	34	senior high school	170	65	76	22.49	non-smokers	5.3	1.26	1.05	no
100	male	51	junior high school	169	77	80	26.96	non-smokers	5.5	1.9	1.12	no
101	male	24	primary school	180	95	110	29.32	current smokers	4.3	1.49	0.94	no
102	male	53	junior high school	167	70	86	25.1	non-smokers	5.8	1.44	0.99	no
103	male	25	junior high school	165	66	79	24.24	non-smokers	5.9	1.31	1.15	no
104	male	55	junior high school	170	65	80	22.49	current smokers	4.3	2.07	1.38	no
105	male	31	junior high school	165	55	74	20.2	current smokers	4.5	0.96	1.2	no
106	male	20	primary school	155	54	73	22.48	non-smokers	5.1	0.67	1.09	no
107	male	19	senior high school	187	67	75	19.16	non-smokers	5.2	0.8	0.85	no
108	male	44	senior high school	165	67	90	24.61	current smokers	5.3	1.65	1.14	no
109	male	29	unspecified	168	62	79	21.97	non-smokers	4.6	1.58	1.07	no
110	male	41	junior high school	168	73	92	25.86	current smokers	5.7	1.37	1.06	no
111	male	55	senior high school	166	60	84	21.77	non-smokers	4	0.74	1.54	no
112	male	37	junior high school	175	75	97	24.49	current smokers	4.1	2.55	1.37	no
113	male	47	junior high school	170	65	86	22.49	non-smokers	5.6	0.93	1.54	no
114	male	24	primary school	173	64	77	21.38	current smokers	5	0.58	1.05	no
115	male	27	senior high school	172	82	91	27.72	current smokers	5.3	3.88	1.47	no
116	male	57	university or higher	167	73.5	97	26.35	non-smokers	5.4	1.06	1.81	no
117	male	22	university or higher	175	67	79	21.88	non-smokers	5.2	2.51	1.1	no
118	male	35	junior high school	173	85	101	28.4	current smokers	5.1	1.95	0.79	no
119	male	61	primary school	163	62	84	23.34	current smokers	5.2	4.78	1.4	no
120	male	48	junior high school	170	80	98	27.68	current smokers	5.9	2.15	1.01	no
121	male	29	senior high school	165	72	90	26.45	current smokers	5.1	1.71	1.05	no
122	male	57	primary school	175	56	80	18.29	current smokers	3.9	0.75	1.09	no
123	male	64	senior high school	148	66	80	30.13	current smokers	5	0.83	1.12	no
124	male	29	senior high school	178	67	77	21.15	current smokers	4.6	0.46	0.99	no
125	male	64	junior high school	173	69	97	23.05	non-smokers	5.1	1.11	1.37	no
126	male	27	university or higher	175	60	83	19.59	current smokers	5.1	1	0.96	no
127	male	48	junior high school	172	73	80	24.68	current smokers	4.2	0.4	1.42	no
128	male	32	junior high school	165	78	101	28.65	current smokers	5.4	1.88	1	no
129	male	54	junior high school	176	78	93	25.18	previous smokers	5.9	6.61	1.13	no
130	male	62	primary school	159	68	102	26.9	non-smokers	5.4	0.96	1.07	no
131	male	42	unspecified	175	80	115	26.12	non-smokers	4.9	5.54	1.54	no
132	male	50	primary school	166	72	95	26.13	non-smokers	6.4	1.39	1.09	no
133	male	36	senior high school	174	66	79	21.8	non-smokers	5.8	1.12	1.34	no
134	male	27	primary school	167	62	80	22.23	non-smokers	5.2	1.84	1.29	no
135	male	49	primary school	179	86	94	26.84	current smokers	5.2	2.47	1.39	no
136	male	38	unspecified	175	91	113	29.71	non-smokers	4.8	1.7	1.23	no
137	male	32	junior high school	180	69	83	21.3	current smokers	4.9	0.68	1.52	no
138	male	39	junior high school	169	83	98	29.06	current smokers	5.4	3.32	1.09	no
139	male	28	junior high school	173	67	88	22.39	non-smokers	5	0.75	1.59	no
140	male	45	junior high school	175	86	103	28.08	non-smokers	5	0.91	1.8	no
141	male	29	junior high school	162	64	82	24.39	non-smokers	3.6	0.66	1.09	no
142	male	50	primary school	172	76	87	25.69	non-smokers	5.6	0.48	1.32	no
143	male	31	junior high school	161	57	78	21.99	current smokers	5.1	0.54	1.15	no
144	male	27	senior high school	183	97	103	28.96	non-smokers	5.4	2.32	1.1	no
145	male	37	senior high school	170	96	103	33.22	non-smokers	5.2	2.14	0.98	no
146	male	33	unspecified	175	88	95	28.73	non-smokers	4.5	0.94	1.13	no
147	male	50	senior high school	164	60	85	22.31	current smokers	5.2	0.9	0.96	no
148	male	73	senior high school	166	83	93	30.12	non-smokers	5	0.66	1.28	no
149	male	43	primary school	177	80	96	25.54	non-smokers	4.9	0.76	1.06	no
150	male	31	junior high school	171	75	87	25.65	current smokers	3.6	2.27	1.35	no
151	male	56	junior high school	172	71	86	24	current smokers	4.6	2.81	1.68	no
152	male	51	primary school	173	70	85	23.39	current smokers	5.5	2.01	1	no
153	male	40	senior high school	172	70	82	23.66	non-smokers	5.1	1.18	1.44	no
154	male	32	university or higher	164	50	70	18.59	non-smokers	5.5	0.52	1.78	no
155	male	31	junior high school	169	58	68	20.31	non-smokers	4.2	0.94	2.47	no
156	male	51	senior high school	172	94	104	31.77	current smokers	4.7	1.89	1.03	no
157	male	39	junior high school	186	94	94	27.17	current smokers	5.3	1.25	1.09	no
158	male	50	junior high school	167	85	110	30.48	non-smokers	5.6	1.7	1.64	no
159	male	36	junior high school	170	62	86	21.45	current smokers	4.8	1.56	1.59	no
160	male	31	senior high school	181	88	89	26.86	non-smokers	5.4	1.27	1.01	no
161	male	34	junior high school	181	85	94	25.95	non-smokers	4.9	3.81	1.77	no
162	male	36	senior high school	169	66	84	23.11	non-smokers	5.6	1.99	2.04	no
163	male	53	primary school	169	91	107	31.86	non-smokers	7.1	2.98	0.98	no
164	male	48	senior high school	163	66	91	24.84	non-smokers	5.9	1.93	1.18	no
165	male	67	primary school	169	72	90	25.21	non-smokers	6.9	6.93	1.34	no
166	male	44	primary school	170	73	90	25.26	non-smokers	4.7	1.17	1.15	no
167	male	49	primary school	173.5	73.5	81	24.42	non-smokers	4.63	1.17	1.38	no
168	male	42	junior high school	171	66.4	78	22.71	non-smokers	6	2.17	1.07	no
169	male	47	junior high school	172	70	88	23.66	non-smokers	3.8	0.92	1.47	no
170	male	54	primary school	175	70	80	22.86	current smokers	3.99	0.32	1.66	no
171	male	35	primary school	182	85	112	25.66	current smokers	4.9	2.76	0.98	no
172	male	27	junior high school	175	65	80	21.22	non-smokers	4.3	1.61	1.03	no
173	male	51	junior high school	171	74	90	25.31	non-smokers	3.67	1.16	1.33	no
174	male	47	junior high school	172	82	110	27.72	non-smokers	5.8	2.68	1.2	no
175	male	44	senior high school	176	74	93	23.89	current smokers	5	1.88	0.85	no
176	male	43	unspecified	166	85	113	30.85	non-smokers	4.5	3.99	1.24	no
177	male	59	primary school	168	70	84	24.8	non-smokers	5	2.93	1.06	no
178	male	38	illiteracy	157	55	86	22.31	non-smokers	4.5	0.64	1.19	no
179	male	43	junior high school	175	81	97	26.45	non-smokers	4.6	5.6	1.43	no
180	male	50	primary school	182	82	94	24.76	non-smokers	5.3	1.65	1.22	no
181	male	63	junior high school	173	83	94	27.73	non-smokers	5.7	3.65	1.13	no
182	male	56	primary school	169	79	96	27.66	non-smokers	4.5	0.65	1.24	no
183	male	69	illiteracy	175	98	113	32	non-smokers	4	1.15	0.68	no
184	male	40	junior high school	165	62	75	22.77	non-smokers	7.1	2.01	1.28	no
185	male	50	junior high school	166	85	80	30.85	non-smokers	5.05	0.56	0.91	no
186	male	64	illiteracy	167	69	98	24.74	non-smokers	17.2	3.52	1.19	no
187	male	35	junior high school	176	75	85	24.21	current smokers	5	1.36	2.55	no
188	male	43	junior high school	175	64	78	20.9	current smokers	6.4	1.22	1.14	no
189	male	37	junior high school	170	75	92	25.95	current smokers	5.6	1.74	1.83	no
190	male	49	primary school	172	75.1	86	25.39	non-smokers	5.3	0.89	0.96	no
191	male	51	junior high school	165	80	104	29.38	non-smokers	5.2	0.51	1.32	no
192	male	56	senior high school	167	73	89	26.18	non-smokers	5.8	1.93	0.9	no
193	male	28	junior high school	172	68	104	22.99	non-smokers	5.9	0.62	1.55	no
194	male	15	senior high school	178	53	66	16.73	non-smokers	5.3	1.15	0.83	no
195	male	35	junior high school	165	63	73	23.14	non-smokers	4.59	2.63	1.31	no
196	male	57	unspecified	172	72	92	24.34	current smokers	5.3	1.18	1.68	no
197	male	28	junior high school	171	72	84.5	24.62	current smokers	3.8	1.72	1.29	no
198	male	17	senior high school	181	58	70	17.7	non-smokers	5.5	0.65	1.32	no
199	male	54	junior high school	173	97	110	32.41	non-smokers	5.5	0.94	1.1	no
200	male	44	senior high school	170	75	89	25.95	non-smokers	5.2	7.39	1.28	no
201	male	17	university or higher	177	50	63	15.96	non-smokers	4.8	0.68	0.92	no
202	male	77	senior high school	153	47	81	20.08	non-smokers	5.8	1.29	1.22	no
203	male	81	illiteracy	162	72	94	27.43	non-smokers	4.3	0.8	1.62	no
204	male	43	junior high school	168	62	88	21.97	non-smokers	4.3	2.17	1.34	no
205	male	46	junior high school	170	61	85	21.11	current smokers	4.5	1.91	1.57	no
206	male	31	junior high school	150	74	90	32.89	non-smokers	4.4	1.047	1.5	no
207	male	48	junior high school	167	56	73	20.08	current smokers	4.6	0.4	0.98	no
208	male	37	junior high school	178	87	100	27.46	non-smokers	4.6	0.57	1.34	no
209	male	32	university or higher	172	84	104	28.39	non-smokers	5.1	1.1	1.1	no
210	male	54	junior high school	179	76	89	23.72	non-smokers	4.1	0.95	0.98	no
211	male	40	senior high school	175	95	96	31.02	non-smokers	3.9	1.65	1.15	no
212	male	44	senior high school	165	75	90	27.55	current smokers	7	4.39	1.02	no
213	male	67	illiteracy	184	84	101	24.81	non-smokers	5.6	1.24	1.16	no
214	male	46	unspecified	162	89	112	33.91	current smokers	4.7	1.36	1.37	no
215	male	31	university or higher	172	80	93	27.04	non-smokers	6.4	1.7	0.89	no
216	male	80	illiteracy	156	60	86	24.65	non-smokers	5	1.65	1.37	no
217	male	65	unspecified	169	71	92	24.86	non-smokers	5.8	1.34	1.19	no
218	male	44	junior high school	164	89.6	100	33.31	non-smokers	5.5	4.84	1.08	no
219	male	48	junior high school	162	68	91	25.91	current smokers	5	5.12	1.29	no
220	male	26	senior high school	180	66	73	20.37	current smokers	5.2	0.99	1.05	no
221	male	48	junior high school	189	80	91	22.3	current smokers	4.4	1.69	1.39	no
222	male	44	junior high school	165	64.8	93	23.8	non-smokers	5	1.21	0.88	no
223	male	23	university or higher	189	69	78	19.32	non-smokers	5	0.71	1.13	no
224	male	28	unspecified	174	65	80	21.47	current smokers	6.1	1.49	1.6	no
225	male	35	junior high school	172	76	82	25.69	current smokers	5.3	0.54	1.03	no
226	male	43	junior high school	166	63.2	81	22.94	current smokers	5.2	1.81	1.09	no
227	male	62	primary school	169	63.5	93	22.23	non-smokers	4.13	1.42	1.79	no
228	male	65	junior high school	160	60	89	23.44	current smokers	4.3	1.44	1.55	no
229	male	45	primary school	172	79	95	26.7	non-smokers	4.63	0.44	1.45	no
230	male	38	junior high school	162	67	112	25.53	non-smokers	4.5	1.47	1.07	no
231	male		missing data	165	68	87	24.98	non-smokers	5.4	11.24	1.23	no
232	male	29	junior high school	166	67	82	24.31	current smokers	4.27	0.2	1.1	no
233	male	59	junior high school	170	61	88	21.11	current smokers	4.3	0.57	1.01	no
234	male	64	junior high school	167	61	83	21.87	previous smokers	4.22	0.72	1.77	no
235	male	41	senior high school	170	70	82	24.22	previous smokers	4.16	6.96	0.75	no
236	male	28	senior high school	170	52	79	17.99	current smokers	2.81	0.6	1.66	no
237	male	62	primary school	167.5	81	101	28.87	current smokers	4.08	2.42	1.11	no
238	male	55	junior high school	170	75.5	104	26.12	current smokers	4.7	1.76	1.22	no
239	male	48	junior high school	180	93	102	28.7	current smokers	4.84	1.72	1.28	no
240	male	60	junior high school	168	71	94	25.16	previous smokers	6.31	1.3	1.21	no
241	male	37	junior high school	173	84	91	28.07	non-smokers	4.98	0.45	1.42	no
242	male	51	primary school	175	99	107	32.33	non-smokers	4.25	1.3	1.45	no
243	male	39	primary school	174	71	81	23.45	current smokers	4.8	0.75	1.23	no
244	male	56	primary school	170	75	94	25.95	non-smokers	5	1.26	2.01	no
245	male	30	senior high school	170	68	83	23.53	non-smokers	5	0.51	1.58	no
246	male	71	primary school	165	63	97	23.14	non-smokers	4	1.56	3.38	no
247	male	45	junior high school	168	68	60	24.09	current smokers	4.42	0.85	1.08	no
248	male	53	junior high school	174	91	107	30.06	current smokers	6	1.27	1.07	no
249	male	30	primary school	165	50	71	18.37	current smokers	4.3	1.82	1.38	no
250	male	50	junior high school	172	63	77	21.3	current smokers	4.22	1.06	1.22	no
251	male	59	junior high school	171	81	99	27.7	current smokers	5.2	4.35	0.98	no
252	male	73	illiteracy	169.5	64.5	93	22.45	current smokers	4.03	1.08	1.52	no
253	male	46	primary school	165	67	84	24.61	non-smokers	4.12	3.2	2.94	no
254	male	38	illiteracy	169	73	80	25.56	non-smokers	4.1	1.9	0.94	no
255	male	35	senior high school	163	57	78	21.45	non-smokers	3.96	0.38	1.96	no
256	male	38	junior high school	170	74.9	81	25.92	current smokers	5.43	1.39	1.67	no
257	male	33	junior high school	170	60	86	20.76	non-smokers	4.38	2.04	1.43	no
258	male	48	primary school	178	59.8	90	18.87	current smokers	6.3	1.36	1.33	no
259	male	47	junior high school	183	101	108	30.16	non-smokers	4.27	0.92	1.39	no
260	male	22	junior high school	173	83	95	27.73	current smokers	4.5	0.49	1.57	no
261	male	31	junior high school	174.5	66	75	21.67	non-smokers	4.9	0.74	1.92	no
262	male	72	illiteracy	167	58	78	20.8	non-smokers	5.09	1.88	1.71	no
263	male	73	unspecified	163	60.5	82	22.77	non-smokers	4.1	0.38	2.03	no
264	male	52	junior high school	168	95	101	33.66	current smokers	4.25	0.97	1.07	no
265	male	21	senior high school	172.5	78.5	78	26.38	non-smokers	4.2	1.19	1.11	no
266	male	31	senior high school	188	71.3	81	20.17	non-smokers	4.51	0.54	1.35	no
267	male	37	senior high school	161	67	82	25.85	current smokers	5.03	1.39	1.04	no
268	male	60	primary school	159	62	79	24.52	non-smokers	4.25	1.39	0.98	no
269	male	28	senior high school	177	76	88	24.26	non-smokers	3.92	3.17	1.07	no
270	male	26	university or higher	177	60	73	19.15	current smokers	4.13	0.94	1.51	no
271	male	42	junior high school	169	65	80	22.76	current smokers	3.98	1.06	1.68	no
272	male	59	primary school	174	73	92	24.11	non-smokers	5.55	0.91	1.33	no
273	male	66	junior high school	166	75	112	27.22	previous smokers	4.27	0.55	0.97	no
274	male	44	primary school	165	75	93	27.55	non-smokers	5.84	0.75	1.34	no
275	male	41	junior high school	167	68	88	24.38	non-smokers	5.1	2.83	0.94	no
276	male	52	primary school	164	80	101	29.74	non-smokers	4.4	4.55	1.45	no
277	male	32	junior high school	170	72	90	24.91	non-smokers	4.7	1.07	1.7	no
278	male	76	illiteracy	163	64	89	24.09	previous smokers	4.12	0.46	1.29	no
279	male	32	junior high school	162	74	91	28.2	non-smokers	5.23	1.06	1.14	no
280	male	39	junior high school	169	73	85	25.56	non-smokers	4.25	0.73	1.37	no
281	male	34	junior high school	152	55	86	23.81	current smokers	3.8	1.1	1.31	no
282	male	26	university or higher	182	92	101	27.77	current smokers	5	1.57	1.13	no
283	male	54	junior high school	175	59	73	19.27	current smokers	4.3	1.24	1.85	no
284	male	49	primary school	173	82	96	27.4	current smokers	3.7	4.75	1.6	no
285	male	39	primary school	166	60	73	21.77	non-smokers	5.8	1.12	1.24	no
286	male	50	primary school	177	80	99	25.54	current smokers	3.9	2.16	2.12	no
287	male	59	primary school	170	81	91	28.03	previous smokers	5.67	1.3	1.18	no
288	male	19	primary school	176	70	80	22.6	non-smokers	4.1	0.53	1.2	no
289	male	42	primary school	147	59	92	27.3	non-smokers	4.21	0.63	1.76	no
290	male	25	senior high school	180	71	86	21.91	non-smokers	5.1	0.77	1.12	no
291	male	48	unspecified	179	91	103	28.4	current smokers	5.8	1.57	1.09	no
292	male	56	primary school	166	62	69	22.5	current smokers	5.1	0.55	1.59	no
293	male	54	junior high school	176	83	90	26.79	non-smokers	4.01	0.49	1.73	no
294	male	16	junior high school	181	65	78	19.84	non-smokers	5.2	0.85	1.12	no
295	male	43	senior high school	163	62	87	23.34	current smokers	4.6	2.42	1.16	no
296	male	45	junior high school	170	78	95	26.99	non-smokers	3.98	4.01	0.79	no
297	male	37	junior high school	169	67	84	23.46	non-smokers	4.07	0.69	1.35	no
298	male	43	primary school	169	80	101	28.01	non-smokers	4.1	0.66	1.44	no
299	male	73	primary school	175	70	88	22.86	non-smokers	4.86	0.43	0.94	no
300	male	74	primary school	160	54	80	21.09	previous smokers	4	1.11	1.73	no
301	male	69	primary school	155	58	88	24.14	non-smokers	3.9	0.48	1.42	no
302	male	62	primary school	157	57	86	23.12	non-smokers	4.01	0.6	1.33	no
303	male	41	junior high school	177	70	81	22.34	non-smokers	4.4	1.25	1.35	no
304	male	80	primary school	150	50	79	22.22	non-smokers	4.04	0.43	1.23	no
305	male	45	junior high school	167	57	74	20.44	current smokers	5.2	1.37	1.57	no
306	male	48	junior high school	167	68	92	24.38	current smokers	6	1.32	1.72	no
307	male	44	junior high school	176	83	95	26.79	non-smokers	5.6	0.95	1.37	no
308	male	20	junior high school	177	73	81	23.3	current smokers	3.9	0.73	0.96	no
309	male	73	primary school	160	74	94	28.91	previous smokers	3.92	1.59	1.47	no
310	male	72	junior high school	165	67	98	24.61	non-smokers	6.1	4.42	1.07	no
311	male	47	unspecified	171	72	90	24.62	current smokers	4.95	1.86	1.77	no
312	male	73	illiteracy	171	75	86	25.65	current smokers	4.93	1.12	0.25	no
313	male	54	senior high school	163	68	93	25.59	current smokers	3.99	2.09	1.05	no
314	male	51	senior high school	160	72.8	87	28.44	non-smokers	4.3	0.94	1.61	no
315	male	38	junior high school	166	78	94	28.31	non-smokers	5.8	0.56	1.82	no
316	male	31	junior high school	165	77	80	28.28	current smokers	3.95	0.77	1.99	no
317	male	50	primary school	179	80	90	24.97	current smokers	4.4	0.88	0.7	no
318	male	48	primary school	163	84	99	31.62	non-smokers	4.45	0.99	1.28	no
319	male	67	junior high school	157	45	72	18.26	non-smokers	5	0.69	2.14	no
320	male	47	junior high school	169	69	90	24.16	current smokers	5.4	0.62	1.3	no
321	male	49	primary school	180	80	89	24.69	current smokers	5.17	1.98	3.09	no
322	male	34	junior high school	179	74	90	23.1	non-smokers	4.73	0.69	1.32	no
323	male	32	senior high school	180	75	90	23.15	current smokers	5.2	2.65	0.97	no
324	male	67	primary school	160	65	92	25.39	non-smokers	3.98	0.95	1.38	no
325	male	47	primary school	165	66	83	24.24	non-smokers	4.1	1.25	0.9	no
326	male	28	junior high school	167	58	82	20.8	non-smokers	3.8	2.57	1.71	no
327	male	50	senior high school	164	73	96	27.14	previous smokers	4.62	1.47	1.3	no
328	male	41	junior high school	174	63	84	20.81	current smokers	3.97	0.72	1.22	no
329	male	38	primary school	170	91	106	31.49	current smokers	4.16	0.88	1.09	no
330	male	32	junior high school	179	85	101	26.53	current smokers	4.8	3.85	0.97	no
331	male	51	primary school	169	78	96	27.31	current smokers	5.4	1.18	0.97	no
332	male	42	unspecified	160	60	82	23.44	non-smokers	5.1	1.95	1.17	no
333	male	49	junior high school	166	82	107	29.76	current smokers	4.16	1.69	1.13	no
334	male	51	junior high school	174	90	113	29.73	non-smokers	4.02	0.59	1.02	no
335	male	28	junior high school	179	103	108	32.15	current smokers	5.1	1.85	0.96	no
336	male	40	junior high school	161	62	83	23.92	non-smokers	5.9	1.4	1.3	no
337	male	48	junior high school	162	68	89	25.91	current smokers	4.08	3.07	1.02	no
338	male	53	junior high school	163	77	81	28.98	non-smokers	4	1.67	1.28	no
339	male	31	university or higher	175	75	87	24.49	current smokers	4.37	1.05	1.13	no
340	male	53	senior high school	166	82	96	29.76	non-smokers	5.1	0.52	1.33	no
341	male	50	primary school	162	50	70	19.05	current smokers	3.7	1.21	0.93	no
342	male	67	junior high school	162	75	98	28.58	non-smokers	4.1	0.65	1.5	no
343	male	39	junior high school	177	65	77	20.75	current smokers	4.6	1.09	2.06	no
344	male	29	primary school	173	57	70	19.05	non-smokers	3.8	0.64	1.49	no
345	male	42	junior high school	165	58	84	21.3	current smokers	4.14	0.23	1.52	no
346	male	68	illiteracy	170	60	76	20.76	non-smokers	5.07	0.62	1.56	no
347	male	43	junior high school	177	77.5	85	24.74	current smokers	4.1	0.79	1.11	no
348	male	54	primary school	172	90.5	95	30.59	non-smokers	5.27	0.74	1.99	no
349	male	27	senior high school	169	67	74	23.46	current smokers	4.77	0.79	1.44	no
350	male	39	junior high school	164	82	105	30.49	non-smokers	3.6	1.29	2.91	no
351	male	76	junior high school	165	94	117	34.53	previous smokers	5.9	2.34	1.44	no
352	male	34	primary school	158	47	74	18.83	non-smokers	4.64	0.25	1.42	no
353	male	24	junior high school	163	64.5	70	24.3	non-smokers	4.35	1.16	1.1	no
354	male	26	junior high school	168.5	80	92	28.18	non-smokers	4.07	1.07	1.83	no
355	male	54	senior high school	162	70	90	26.67	non-smokers	3.91	1.02	1.41	no
356	male	61	junior high school	167	66	90	23.67	non-smokers	5.2	1.87	1.21	no
357	male	31	junior high school	180	60	71	18.52	current smokers	4.2	0.77	1.72	no
358	male	32	junior high school	168	80	94	28.34	current smokers	5.6	5.77	0.78	no
359	male	55	junior high school	178	87	103	27.46	current smokers	6.1	7.52	1.5	no
360	male	32	junior high school	182	94	104	28.38	non-smokers	3.91	1.39	0.94	no
361	male	22	senior high school	177	67	79	21.39	current smokers	3.93	1.33	1.17	no
362	male	50	junior high school	166	62	82	22.5	current smokers	4.29	2.6	1.21	no
363	male	48	junior high school	171.5	75	83	25.5	non-smokers	4.35	3.09	0.82	no
364	male	36	junior high school	175	63	78	20.57	current smokers	3.9	0.53	1.7	no
365	male	63	primary school	162	67	100	25.53	non-smokers	6.4	1.69	0.86	no
366	male	49	junior high school	162	74	97	28.2	non-smokers	8.1	2.44	1.49	no
367	male	51	primary school	171	79	94	27.02	previous smokers	5.8	0.75	1.45	no
368	male	61	primary school	172	72	90	24.34	non-smokers	3.8	1.89	1.59	no
369	male	26	senior high school	177	88	95	28.09	current smokers	3.7	1.43	1.14	no
370	male	68	primary school	156	67	91	27.53	previous smokers	4.28	0.47	1.09	no
371	male	49	junior high school	162	86	96	32.77	current smokers	5.68	2.59	1.28	no
372	male	50	primary school	184	81.6	104	24.1	non-smokers	4.6	0.78	2.49	no
373	male	62	primary school	169	89	111	31.16	current smokers	5.3	2.96	0.73	no
374	male	75	illiteracy	173	75	98	25.06	non-smokers	4.6	1.2	1.45	no
375	male	72	illiteracy	170	74	98	25.61	non-smokers	4.6	4.3	1	no
376	male	46	junior high school	175	80	102	26.12	non-smokers	4.03	2.18	2.52	no
377	male	46	senior high school	172	84	102	28.39	current smokers	5.9	3.27	0.87	no
378	male	26	senior high school	166	64.4	88	23.37	current smokers	5	0.97	1.38	no
379	male	30	senior high school	172	78	93	26.37	current smokers	5.3	0.99	1.54	no
380	male	44	senior high school	170	74	93	25.61	non-smokers	4.8	1.57	1.21	no
381	male	53	junior high school	176	72	89	23.24	current smokers	4.5	2.13	1.19	no
382	male	40	primary school	166	74	85	26.85	non-smokers	4.69	0.51	1.49	no
383	male	70	primary school	162	76	96	28.96	non-smokers	3.96	1.56	1.11	no
384	male	50	primary school	163	73	100	27.48	non-smokers	4.13	2.72	0.97	no
385	male	48	unspecified	163	67	87	25.22	non-smokers	5.4	1.74	1.28	no
386	male	42	junior high school	165	60	72	22.04	non-smokers	5.8	0.99	1.61	no
387	male	29	junior high school	158.5	53.5	75	21.3	current smokers	4.07	0.94	1.37	no
388	male	53	junior high school	170	63	95	21.8	non-smokers	5	0.75	1.81	no
389	male	48	junior high school	173	71	88	23.72	non-smokers	4.2	2.36	1.15	no
390	male	25	senior high school	176	78.3	92	25.3	current smokers	3.9	1.7	1.44	no
391	male	58	primary school	161	61.3	81	23.65	non-smokers	4.26	0.66	4.04	no
392	male	50	primary school	175	75	90	24.49	current smokers	4	1.51	1.42	no
393	male	58	primary school	173	98	105	32.74	current smokers	4	2.23	1.32	no
394	male	47	senior high school	170	73	88	25.26	non-smokers	4.09	0.64	1.14	no
395	male	48	junior high school	179	91	100	28.4	previous smokers	6.25	0.87	1.09	no
396	male	46	junior high school	173	69	84	23.05	current smokers	3.9	1.5	1.53	no
397	male	56	primary school	172	72	84	24.34	current smokers	4	0.59	1.23	no
398	male	74	illiteracy	166	72	97	26.13	non-smokers	4.77	0.54	1.08	no
399	male	21	senior high school	179	88	87	27.46	current smokers	5.1	1.34	1.1	no
400	male	63	primary school	172	77	98	26.03	current smokers	4.12	0.48	1.42	no
401	male	80	illiteracy	157	58	79	23.53	non-smokers	4.96	1.5	1.52	no
402	male	25	junior high school	184	77	83	22.74	current smokers	4	0.78	2.03	no
403	male	44	junior high school	168	68	85	24.09	non-smokers	4	5.33	1.06	no
404	male	31	primary school	181	84.4	94	25.76	current smokers	4	1.4	1.14	no
405	male	66	illiteracy	172	80	98	27.04	non-smokers	6.25	1.28	1.02	no
406	male	36	junior high school	167	70	82	25.1	current smokers	4.1	3.62	1.21	no
407	male	36	junior high school	175	79	92	25.8	non-smokers	3.99	1.15	1.03	no
408	male	51	primary school	167	83	92	29.76	non-smokers	4.81	1	1.69	no
409	male	28	junior high school	170	62	80	21.45	current smokers	5.2	1.12	1.11	no
410	male	31	junior high school	174	77	92	25.43	non-smokers	3.93	0.48	1.26	no
411	male	59	primary school	160	57	81	22.27	current smokers	4.88	0.8	1.63	no
412	male	74	illiteracy	166	78.5	98	28.49	non-smokers	4.79	0.76	1.44	no
413	male	18	junior high school	172	70	79	23.66	non-smokers	4.5	1.55	1.41	no
414	male	67	primary school	173	66	84	22.05	non-smokers	3.6	1.75	3.31	no
415	male	70	primary school	160	65	78	25.39	non-smokers	4.4	2.05	1.16	no
416	male	45	junior high school	164	56	86	20.82	current smokers	4.13	1.02	3.3	no
417	male	38	university or higher	172	61	68	20.62	non-smokers	5.45	1.24	1.69	no
418	male	52	primary school	167	59	71	21.16	non-smokers	4.55	0.81	3.68	no
419	male	43	junior high school	178	91	92	28.72	non-smokers	5	1.74	1.12	no
420	male	41	junior high school	177	69	86	22.02	non-smokers	5.5	1.34	0.79	no
421	male	64	primary school	158	75	93	30.04	non-smokers	4.89	1.56	0.96	no
422	male	53	senior high school	170	79.1	78	27.37	current smokers	4.2	1.84	1.62	no
423	male	52	primary school	163.5	75	98	28.1	non-smokers	4.1	0.59	1.91	no
424	male	56	primary school	174	82	100	27.08	non-smokers	4.23	0.76	1.3	no
425	male	46	primary school	163	78	92	29.36	non-smokers	4.51	1.64	1.1	no
426	male	66	primary school	170	61	86	21.11	non-smokers	3.99	0.42	0.13	no
427	male	32	junior high school	179.5	73.5	90	22.81	non-smokers	6	0.54	2.69	no
428	male	42	junior high school	168	72	89	25.51	non-smokers	4.9	1.75	1.33	no
429	male	73	primary school	166	73	100	26.49	non-smokers	4.62	1.02	1.46	no
430	male	31	junior high school	161	64	87	24.69	non-smokers	5.8	1.87	1.1	no
431	male	55	primary school	165	61	81	22.41	current smokers	5.3	0.76	2.11	no
432	male	48	primary school	172	61	85	20.62	current smokers	3.39	1.01	1.18	no
433	male	43	junior high school	171	63	60	21.55	current smokers	3.91	0.34	1.39	no
434	male	46	junior high school	166	75	95	27.22	current smokers	3.96	6.5	1.34	no
435	male	34	senior high school	171	88	116	30.09	current smokers	4.03	1.19	0.93	no
436	male	31	university or higher	163	88.4	97	33.27	non-smokers	3.6	1.59	1.43	no
437	male	27	senior high school	184	70	87	20.68	non-smokers	3.89	0.53	1.37	no
438	male	19	primary school	172	53	64	17.92	current smokers	5.03	0.93	1.3	no
439	male	36	primary school	178	77.9	90	24.59	non-smokers	4.5	0.48	0.8	no
440	male	18	junior high school	179.5	69.3	80	21.51	non-smokers	4.5	0.99	1.12	no
441	male	46	junior high school	178.5	98	108	30.76	current smokers	4.62	1.31	1.59	no
442	male	29	junior high school	180	85	95	26.23	current smokers	5.5	0.9	1.48	no
443	male	34	senior high school	170	78	93	26.99	non-smokers	4.42	4.2	0.97	no
444	male	25	senior high school	180	64	76	19.75	current smokers	4.18	0.45	1.45	no
445	male	15	primary school	176	92	110	29.7	non-smokers	7	3.3	1.12	no
446	male	56	primary school	174	72	92	23.78	non-smokers	4.6	1.88	1.12	no
447	male	66	illiteracy	158	66	98	26.44	non-smokers	5.3	1.36	1.29	no
448	male	39	junior high school	166	78	100	28.31	non-smokers	4.28	0.45	1.31	no
449	male	46	primary school	177.5	84.9	92	26.95	non-smokers	4.6	0.81	1.38	no
450	male	33	junior high school	170.5	73.2	90	25.18	current smokers	5.2	3.37	2.13	no
451	male	50	junior high school	177	71	93	22.66	current smokers	4.25	0.79	1.39	no
452	male	36	primary school	170	60	80	20.76	non-smokers	4.12	0.93	1.32	no
453	male	52	primary school	170	72	99	24.91	non-smokers	4.1	0.58	1.81	no
454	male	49	illiteracy	175	76	92	24.82	non-smokers	4.05	1.63	1.12	no
455	male	36	university or higher	168	86	95	30.47	current smokers	4.9	6.51	1.14	no
456	male	57	primary school	170	73	94	25.26	current smokers	6.01	1.45	1.32	no
457	male	47	junior high school	167	70	85	25.1	non-smokers	4.3	1.9	0.99	no
458	male	24	junior high school	175	68	80	22.2	non-smokers	3.6	1.15	1.41	no
459	male	65	primary school	160	82	106	32.03	non-smokers	4.71	1.25	1.95	no
460	male	25	junior high school	180	94.4	91	29.14	current smokers	3.36	4.61	1.03	no
461	male	32	junior high school	167	70	77	25.1	current smokers	3.5	0.69	1.86	no
462	male	33	junior high school	164	82	93	30.49	current smokers	5.16	0.84	1.44	no
463	male	18	primary school	186	72	86	20.81	non-smokers	4.88	0.62	1.05	no
464	male	50	junior high school	175	91.5	102	29.88	previous smokers	4.36	1.04	1.3	no
465	male	77	primary school	161	66	85	25.46	non-smokers	4.8	1.7	3.22	no
466	male	59	senior high school	167	77.5	114	27.79	current smokers	4	1.22	1.2	no
467	male	42	junior high school	175	79	87	25.8	current smokers	4.47	1.36	1.54	no
468	male	31	primary school	175	64.4	89	21.03	non-smokers	4.6	0.58	2.54	no
469	male	77	primary school	165	84	104	30.85	non-smokers	4.1	1.04	1.09	no
470	male	28	senior high school	180	92	88	28.4	non-smokers	4.22	0.49	1.53	no
471	male	42	junior high school	165	62	87	22.77	non-smokers	4.9	1.05	1.08	no
472	male	28	junior high school	181	92	95	28.08	non-smokers	5.8	1.58	1.01	no
473	male	49	primary school	173	63	80	21.05	non-smokers	3.7	1.17	1.7	no
474	male	41	primary school	165	80	101	29.38	current smokers	4.46	2.38	1.1	no
475	male	66	illiteracy	165	58	90	21.3	current smokers	4.5	0.33	1.4	no
476	male	43	senior high school	164	69.5	94	25.84	current smokers	5.3	4.7	1.22	no
477	male	59	primary school	175	83	92	27.1	previous smokers	4.44	0.64	1.47	no
478	male	22	primary school	171	70	85	23.94	non-smokers	4.1	0.66	1.12	no
479	male	32	primary school	172	73.4	89	24.81	non-smokers	4.3	1.1	1.64	no
480	male	56	junior high school	170	92.7	93	32.08	current smokers	4.4	1.84	4.5	no
481	male	36	senior high school	170	79.3	90	27.44	non-smokers	4.4	1.07	1.22	no
482	male	35	primary school	172	73.5	83	24.84	current smokers	4.7	0.71	1.41	no
483	male	32	junior high school	176	82	98	26.47	current smokers	4.84	0.14	1.28	no
484	male	50	junior high school	172	66	78	22.31	current smokers	4.8	0.85	1.41	no
485	male	38	primary school	171.5	60	76	20.4	current smokers	4.39	1.94	1.38	no
486	male	57	junior high school	165	62	88	22.77	current smokers	3.6	1.36	1.37	no
487	male	30	junior high school	175	62	72	20.24	non-smokers	4.16	1.34	1.29	no
488	male	28	junior high school	163.5	53.5	73	20.01	non-smokers	5.15	0.7	0.99	no
489	male	51	junior high school	180	89	92	27.47	current smokers	3.5	1.61	2.3	no
490	male	39	junior high school	165	76	95	27.92	non-smokers	3.9	0.6	1.24	no
491	male	54	primary school	165	62.6	80	22.99	current smokers	4.5	0.6	1.89	no
492	male	37	senior high school	162	58	68	22.1	current smokers	4.29	0.29	1.49	no
493	male	51	junior high school	170	72	81	24.91	current smokers	4.69	1.1	1.59	no
494	male	48	unspecified	172	77	90	26.03	non-smokers	4.04	0.92	1.28	no
495	male	42	primary school	158	56	77	22.43	non-smokers	4.82	1.47	1.31	no
496	male	44	junior high school	179	81	100	25.28	non-smokers	4.13	0.67	1.34	no
497	male	26	senior high school	175	70	72	22.86	non-smokers	5.8	0.71	1.39	no
498	male	45	primary school	164	70	96	26.03	current smokers	5.1	10.59	1.03	no
499	male	44	junior high school	166	72.7	93	26.38	current smokers	4.6	1.3	1.78	no
500	male	49	junior high school	166	73	97	26.49	non-smokers	4.3	1.53	1.54	no
501	male	44	junior high school	161	58	78	22.38	non-smokers	4.39	1.59	1.27	no
502	male	53	primary school	161	50	79	19.29	current smokers	4.74	0.2	1.59	no
503	male	27	junior high school	180	70	74	21.6	non-smokers	4.2	0.89	2.43	no
504	male	63	primary school	162.5	65.6	98	24.84	current smokers	4.1	0.51	1.59	no
505	male	74	illiteracy	166	74	84	26.85	non-smokers	4.05	0.62	1.3	no
506	male	65	primary school	162	68	83	25.91	non-smokers	4.11	0.58	1.24	no
507	male	54	primary school	150	60.2	88	26.76	non-smokers	4.3	0.44	1.46	no
508	male	28	junior high school	174	54	76	17.84	current smokers	4.2	0.56	1.16	no
509	male	70	primary school	160	58	85	22.66	non-smokers	5.8	1.39	1.57	no
510	male	54	primary school	171	71	80	24.28	non-smokers	3.9	1.07	1.37	no
511	male	48	primary school	165	74	99	27.18	non-smokers	4.8	1.74	4.2	no
512	male	26	junior high school	175	94.5	97	30.86	current smokers	4.1	2.82	1.34	no
513	male	43	junior high school	154.5	84.5	100	35.4		4.9	1.11	1.22	no
514	male	69	junior high school	165	68	82	24.98	previous smokers	4.2	0.88	1.36	no
515	male	79	primary school	170	67	95	23.2	previous smokers	4.62	2.42	1.4	no
516	male	49	primary school	178	95	102	29.98	current smokers	4.09	1.26	1.4	no
517	male	40	primary school	170	68	74	23.53	current smokers	5.12	0.71	1.47	no
518	male	32	senior high school	177	88	92	28.09	current smokers	4.8	2.72	1.52	no
519	male	50	primary school	168	86	105	30.47	non-smokers	4.3	1.26	1.16	no
520	male	81	primary school	171	70	96	23.94	non-smokers	4.23	1.4	0.86	no
521	male	46	junior high school	172	62	80	20.96	non-smokers	4.99	0	2.54	no
522	male	49	primary school	169	53	63	18.56	non-smokers	3.96	0.67	1.1	no
523	male	36	university or higher	164	58.7	80	21.82	non-smokers	4.6	0.56	1.71	no
524	male	46	primary school	172	83	93	28.06	current smokers	4.3	6.73	1.37	no
525	male	20	junior high school	177	74	85	23.62	non-smokers	5.5	5.04	1.35	no
526	male	31	senior high school	182	90.1	94	27.2	non-smokers	4.37	1.49	1.3	no
527	male	39	junior high school	178	57	73	17.99	current smokers	4.5	0.57	1.57	no
528	male	50	primary school	163	71	94	26.72	non-smokers	4.4	1.04	1.45	no
529	male	52	junior high school	165	57	84	20.94	non-smokers	5.67	0.46	1.6	no
530	male	28	junior high school	186	85	89	24.57	current smokers	4.25	1.17	0.85	no
531	male	37	senior high school	159	49	68	19.38	current smokers	3.92	0.84	1.46	no
532	male	62	primary school	175	72	79	23.51	non-smokers	5.2	0.64	1.44	no
533	male	42	junior high school	176	74	86	23.89	current smokers	4.82	1.29	2.36	no
534	male	27	junior high school	160	50	68	19.53	current smokers	4.8	0.63	1.74	no
535	male	43	primary school	177	81	90	25.85	current smokers	4.6	5.56	2.12	no
536	male	36	primary school	155	58	71	24.14	non-smokers	3.9	1.14	0.94	no
537	male	65	primary school	166	63	89	22.86	non-smokers	4.58	1.12	1.32	no
538	male	50	senior high school	162	60	80	22.86	non-smokers	4.3	0.55	2.46	no
539	male	17	primary school	174	59.5	74	19.65	non-smokers	3.8	2.14	1.64	no
540	male	48	primary school	177	72	80	22.98	current smokers	3.9	0.68	1.47	no
541	male	60	primary school	160	56	78	21.88	non-smokers	5.15	0.85	1.73	no
542	male	53	primary school	167	98	117	35.14	non-smokers	5.9	3.34	1.53	no
543	male	24	junior high school	175	64	70	20.9	current smokers	4.67	0.51	1.56	no
544	male	30	junior high school	166.5	58.4	72	21.07	current smokers	3.9	0.6	1.52	no
545	male	34	junior high school	173	80	89	26.73	non-smokers	4.38	1.13	1.35	no
546	male	64	primary school	157	50	72	20.28	non-smokers	4.05	0.4	1.43	no
547	male	71	junior high school	169	82	100	28.71	non-smokers	4.08	1.81	1.08	no
548	male	79	illiteracy	170	68	89	23.53	non-smokers	4.7	1.03	1.4	no
549	male	24	senior high school	170	79	85	27.34	current smokers	4	1.64	1.25	no
550	male	40	junior high school	167	78	91	27.97	previous smokers	6.6	2.26	1.06	no
551	male	46	junior high school	168	81	94	28.7	current smokers	3.64	1.1	1.42	no
552	male	32	junior high school	163	67	84	25.22	current smokers	4.87	1.01	1.63	no
553	male	45	junior high school	167	72	91	25.82	non-smokers	4.41	0.74	1.54	no
554	male	32	senior high school	173.5	79.6	95	26.44	non-smokers	3.8	1.27	1.49	no
555	male	49	primary school	175	77	88	25.14	current smokers	6.63	0.53	1.44	no
556	male	68	primary school	154	45.5	68	19.19	current smokers	5.29	1.54	1.68	no
557	male	52	primary school	170	102	110	35.29	non-smokers	4.43	0.62	1.52	no
558	male	45	primary school	173	75	95	25.06	current smokers	3.9	1.28	1.79	no
559	male		junior high school	156	46.4	59	19.07	non-smokers	4.1	0.99	1.47	no
560	male	65	primary school	182	74	85	22.34	current smokers	5.7	0.92	1.24	no
561	male	56	junior high school	159	60	85	23.73	non-smokers	3.9	2.5	1.34	no
562	male	28	junior high school	174	63	79	20.81	current smokers	3.98	0.25	1.93	no
563	male	60	unspecified	167	53	76	19	current smokers	3.9	1.05	3.38	no
564	male	46	junior high school	175	96.5	103	31.51	non-smokers	5.4	1.26	3.32	no
565	male	63	primary school	162	63	88	24.01	current smokers	4.55	0.5	1.1	no
566	male	53	senior high school	170	80	107	27.68	non-smokers	4.4	0.62	2.39	no
567	male	45	university or higher	172	65	81	21.97	non-smokers	3.9	0.86	1.87	no
568	male	44	primary school	185	90	93	26.3	current smokers	4.6	1.24	1.17	no
569	male	64	primary school	160	57.3	83	22.38	non-smokers	5.85	0.79	1.67	no
570	male	27	senior high school	180	101	95	31.17	current smokers	5.6	2.34	1.65	no
571	male	35	junior high school	170	93	105	32.18	non-smokers	3.8	4.33	1.35	no
572	male	35	senior high school	179	98	99	30.59	previous smokers	4.1	2.91	1.08	no
573	male	27	junior high school	169.5	55.1	73	19.18	current smokers	3.6	2.69	1.09	no
574	male	55	primary school	170	85	99	29.41	non-smokers	5.68	0.91	4.44	no
575	male	34	junior high school	177	80	93	25.54	non-smokers	5.6	2.25	1.36	no
576	male	80	primary school	180	77	87	23.77	current smokers	4.56	0.74	1.32	no
577	male	35	junior high school	168	92.5	106	32.77	current smokers	3.92	0.96	2.55	no
578	male	64	primary school	158	84	108	33.65	non-smokers	3.92	0.98	1.6	no
579	male	46	junior high school	160	70	72	27.34	current smokers	4.16	1.46	0.99	no
580	male	41	junior high school	162	77	97	29.34	current smokers	3.4	3.84	3.32	no
581	male	22	junior high school	183	70	80	20.9	current smokers	4.17	0.93	1.12	no
582	male	67	junior high school	175	74.2	90	24.23	current smokers	3.9	2.2	0.93	no
583	male	63	primary school	167	84	98	30.12	previous smokers	4	0.93	1.35	no
584	male	52	primary school	160	67	86	26.17	previous smokers	5.35	0.55	1.37	no
585	male	39	junior high school	176	83	92	26.79	non-smokers	4.5	1.14	1.12	no
586	male	42	junior high school	180	71.6	90	22.1	current smokers	4.46	0.62	1.66	no
587	male	46	primary school	165	62	79	22.77	non-smokers	4.2	1.08	1.31	no
588	male	51	primary school	176	80	98	25.83	current smokers	3.96	2.15	0.74	no
589	male	60	illiteracy	159	64	85	25.32	non-smokers	3.91	1.5	1.56	no
590	male	55	senior high school	175	77	90	25.14	previous smokers	4.02	0.52	1.4	no
591	male	48	primary school	167	70	75	25.1	non-smokers	5.16	0.73	1.44	no
592	male	71	primary school	170	74	88	25.61	non-smokers	4.07	1.74	1.15	no
593	male	34	senior high school	173	72	83	24.06	current smokers	5.2	2.97	1.04	no
594	male	19	primary school	173	70	90	23.39	non-smokers	4	5.23	0.81	no
595	male	47	junior high school	165	76	98	27.92	current smokers	3.9	2.16	1.17	no
596	male	55	senior high school	177	57	72	18.19	non-smokers	4.3	1.52	0.96	no
597	male	44	junior high school	165	60	74	22.04	non-smokers	3.99	0.36	1.39	no
598	male	60	primary school	165	64.2	85	23.58	current smokers	4.2	0.64	1.65	no
599	male	54	primary school	170	77	75	26.64	previous smokers	4.13	1.64	1.14	no
600	male	48	junior high school	165	60	85	22.04	current smokers	4.28	1.06	1.11	no
601	male	44	junior high school	176	63	78	20.34	current smokers	4.55	0.62	1.26	no
602	male	79	senior high school	161	58.8	91	22.68	non-smokers	6	2.7	1.34	no
603	male	61	junior high school	173	78	93	26.1	current smokers	5.3	0.87	1.03	no
604	male	47	junior high school	167	60	88	21.51	previous smokers	6.5	2.41	1.11	no
605	male	47	junior high school	168	77	88	27.28	previous smokers	5.6	2.9	2.7	no
606	male	27	junior high school	166.5	51.8	70	18.69	current smokers	5.4	1.1	1.31	no
607	male	56	primary school	183	83	105	24.78	current smokers	4.7	0.97	1.82	no
608	male	24	junior high school	179	68	82	21.22	current smokers	4.6	1.08	1.13	no
609	male	58	junior high school	172	70	86	23.66	previous smokers	4.4	0.89	1.59	no
610	male	27	senior high school	169	59	71	20.66	current smokers	3.6	0.81	1.63	no
611	male	50	primary school	163	75	92	28.23	current smokers	4.9	3.43	1.16	no
612	male	33	senior high school	166.5	72.7	96	26.22	current smokers	5.3	8.51	0.34	no
613	male	17	senior high school	179.5	65.3	73	20.27	non-smokers	4.6	0.34	1.53	no
614	male	47	junior high school	172	71	88	24	non-smokers	4.9	5.36	0.75	no
615	male	45	junior high school	169	70.1	80	24.54	non-smokers	5.2	0.68	1.74	no
616	male	49	primary school	170	67	82	23.18	previous smokers	5.3	1.09	0.98	no
617	male	51	junior high school	172	79.8	98	26.97	non-smokers	5.8	1.66	1.1	no
618	male	61	junior high school	165	77	80	28.28	previous smokers	5.5	1.65	1.1	no
619	male	30	junior high school	171	67	77	22.91	current smokers	4.3	0.31	1.77	no
620	male	41	junior high school	172	75.8	86	25.62	current smokers	5.3	0.55	1.11	no
621	male	45	junior high school	162	60.3	66	22.8	current smokers	5.6	1.43	1.68	no
622	male	45	junior high school	172	91	108	30	non-smokers	3.9	1.22	1.1	no
623	male	88	illiteracy	158	63	70	25.3	non-smokers	4.6	1.42	1.06	no
624	male	49	junior high school	165.5	84.7	102	30.92	non-smokers	6	3.41	3.41	no
625	male	32	junior high school	172	77	85	26.03	non-smokers	4.1	2.36	0.93	no
626	male	21	junior high school	185	89	88	26	non-smokers	4.3	1.92	1.87	no
627	male	45	primary school	171	70	93	23.94	previous smokers	5.6	1.91	1.19	no
628	male	30	senior high school	162	68	87	25.91	current smokers	5.3	2.33	1.92	no
629	male	57	junior high school	166	95	105	34.48	current smokers	5.6	0.49	0.93	no
630	male	47	junior high school	173	67	74	22.39	current smokers	4.5	1.21	1.78	no
631	male	22	senior high school	184	74	73	21.86	current smokers	5.1	0.68	1.17	no
632	male	33	junior high school	170	68	75	23.53	current smokers	5.3	2.93	1	no
633	male	55	junior high school	162	65	84	24.77	current smokers	5.1	1.51	1.81	no
634	male	28	junior high school	183	79.9	87	23.86	non-smokers	3.7	0.77	0.61	no
635	male	42	junior high school	170	76.6	85	26.51	non-smokers	6	0.95	1.22	no
636	male	35	junior high school	169	78	101	27.31	current smokers	4	0.71	1.29	no
637	male	45	primary school	167	61.3	85	21.98	non-smokers	4.3	1.01	1.38	no
638	male	46	junior high school	173.5	83.3	86	27.67	current smokers	5	0.66	1.31	no
639	male	43	junior high school	169	83	104	29.06	non-smokers	7.2	1.17	3.45	no
640	male	45	primary school	164	63	85	23.42	current smokers	3.7	1.49	1.03	no
641	male	28	university or higher	171.5	72.4	94	24.62	non-smokers	4.6	1.39	1.16	no
642	male	43	junior high school	171	56.2	75	19.22	current smokers	5.7	1.32	2.04	no
643	male	62	junior high school	164	72	76	26.77	non-smokers	4.8	0.93	1.48	no
644	male	38	junior high school	178	82	100	25.88	non-smokers	3.8	1.07	1.19	no
645	male	63	primary school	170	61.9	98	21.42	non-smokers	4.3	3.25	1.73	no
646	male	54	junior high school	166.5	60.9	73	21.97	non-smokers	5.3	5.03	0.1	no
647	male	50	primary school	166	83.6	101	30.34	non-smokers	4.9	0.99	1.5	no
648	male	59	primary school	170	75.6	88	26.16	current smokers	5.3	1.05	1.81	no
649	male	29	junior high school	171	90.2	99	30.85	non-smokers	4.8	1.56	1.08	no
650	male	47	junior high school	167	65.5	78	23.49	current smokers	4.9	0.57	1.73	no
651	male	40	junior high school	166.2	73.2	93	26.5	current smokers	5.2	1.7	0.82	no
652	male	63	primary school	172.5	65.1	86	21.88	previous smokers	4.8	1.48	1.11	no
653	male	22	university or higher	168	78	86	27.64	current smokers	4.3	2.09	2.34	no
654	male	42	primary school	157	90	110	36.51	non-smokers	5.4	2	1.05	no
655	male	47	primary school	153	60.2	83	25.72	non-smokers	5.4	1.07	1.44	no
656	male	17	junior high school	169	56.9	72	19.9	non-smokers	3.9	1.44	1.39	no
657	male	44	junior high school	178	64	82	20.2	current smokers	5.5	4.02	1.65	no
658	male	51	university or higher	178	78	82	24.62	non-smokers	5.9	1.61	0.95	no
659	male	38	junior high school	170	76	90	26.3	current smokers	5	1.81	1.49	no
660	male	45	junior high school	165	68	85	24.98	current smokers	5.6	2.04	0.82	no
661	male	41	junior high school	166.5	61.9	76	22.33	current smokers	5.2	0.41	1.03	no
662	male	63	junior high school	173	70	78	23.39	current smokers	5.2	0.59	1.73	no
663	male	64	primary school	171	67.4	94	23.05	current smokers	4.9	1.93	1.87	no
664	male	46	junior high school	166	63.8	84	23.15	current smokers	6.4	0.93	1.32	no
665	male	35	junior high school	170	87.2	97	30.17	previous smokers	6.2	5.09	0.59	no
666	male	45	primary school	169	77.9	91	27.27	non-smokers	5.6	2.05	1.78	no
667	male	47	junior high school	163	74.5	94	28.04	current smokers	4.6	2.03	1.99	no
668	male	58	junior high school	179	72	95	22.47	current smokers	5.6	1.39	1.35	no
669	male	34	university or higher	185	88.5	95	25.86	non-smokers	4.5	2.15	1.63	no
670	male	32	senior high school	173	79.4	92.5	26.53	non-smokers	5.1	2.1	1.68	no
671	male	61	junior high school	160	57	82	22.27	current smokers	5	2.15	1.03	no
672	male	41	junior high school	166	70	83	25.4	current smokers	5.4	3.07	1.11	no
673	male	61	primary school	168	80	100	28.34	non-smokers	3.95	0.63	1.48	no
674	male	54	primary school	173	59	78	19.71	current smokers	5.3	1.72	0.94	no
675	male	25	senior high school	174	76	83	25.1	non-smokers	5.5	0.63	1.52	no
676	male	46	primary school	171	76	93	25.99	current smokers	3.8	0.89	1.1	no
677	male	58	junior high school	167	73	79	26.18	current smokers	6.2	1.56	1.13	no
678	male	60	primary school	166	59	66	21.41	current smokers	5.5	2.49	1.13	no
679	male	26	senior high school	166	56	87	20.32	non-smokers	4.8	0.61	1.41	no
680	male	28	junior high school	191	77.1	83	21.13	current smokers	4.6	1.82	0.7	no
681	male	55	junior high school	167	74	85	26.53	non-smokers	5.8	0.86	1.56	no
682	male	53	junior high school	166	72.4	95	26.27	non-smokers	4.9	2	1.98	no
683	male	40	junior high school	160	60	88	23.44	current smokers	5.7	1.71	1.48	no
684	male	30	junior high school	180	82	90	25.31	current smokers	3.9	2.55	1.28	no
685	male	63	primary school	177	90	110	28.73	current smokers	4.7	1.66	1.09	no
686	male	47	junior high school	170	75.3	93	26.06	non-smokers	4.5	4.35	0.88	no
687	male	40	junior high school	180.5	91.5	105	28.08	current smokers	5.1	3.16	1.03	no
688	male	45	primary school	170	73	85	25.26	current smokers	4.7	0.3	2.13	no
689	male	49	junior high school	173.5	79.3	91.5	26.34	current smokers	5.3	1.31	1.23	no
690	male	49	junior high school	168	63	75	22.32	current smokers	4.7	0.98	1.9	no
691	male	35	senior high school	179.5	96.2	98	29.86	current smokers	5.7	0.78	2.47	no
692	male	30	junior high school	176	85	95	27.44	current smokers	5.2	2.93	0.76	no
693	male	42	junior high school	155.8	52.6	74	21.67	current smokers	5.6	1.41	1.63	no
694	male	71	primary school	175	87	104	28.41	non-smokers	4	0.85	1.92	no
695	male	32	university or higher	178	62.7	73	19.79	non-smokers	5.25	1.14	1.68	no
696	male	62	primary school	168	87	101	30.82	previous smokers	5.5	1.56	1.05	no
697	male	58	primary school	163	61	88	22.96	previous smokers	5.3	0.57	1.03	no
698	male	37	junior high school	173	77	99	25.73	current smokers	5.3	3.69	1.32	no
699	male	52	junior high school	158	54.9	76	21.99	non-smokers	5.3	1.27	1.44	no
700	male	46	junior high school	165	48	77	17.63	current smokers	4.8	1.37	1.24	no
701	male	46	junior high school	173	84	99	28.1	non-smokers	4.2	1.14	1.34	no
702	male	65	primary school	164	74	92	27.51	non-smokers	5.4	0.83	4.86	no
703	male	67	illiteracy	160	63	94	24.61	current smokers	4.6	1.29	1.64	no
704	male	41	junior high school	177	79.4	92	25.34	current smokers	5.2	2.48	0.72	no
705	male	51	junior high school	169.5	74.3	85	25.86	current smokers	5.2	2.12	1.1	no
706	male	29	university or higher	174	70	78	23.12	current smokers	4.8	1.83	1.36	no
707	male	42	junior high school	168	49	73	17.36	current smokers	5.2	0.51	1.51	no
708	male	62	junior high school	165.5	72.7	89	26.54	current smokers	4.7	1.39	1.17	no
709	male	62	illiteracy	160	54	79	21.09	current smokers	5.4	0.6	1.34	no
710	male	61	junior high school	167.5	62.9	80	22.42	current smokers	5.6	0.69	1.02	no
711	male	46	junior high school	178.5	87.9	96	27.59	non-smokers	6	0.96	1.31	no
712	male	43	junior high school	165	75	80	27.55	current smokers	5.4	1.45	1.41	no
713	male	53	junior high school	165	53	70	19.47	current smokers	5.4	1.06	1.5	no
714	male	36	primary school	174.5	94.7	100	31.1	current smokers	5.6	2.29	1.15	no
715	male	32	junior high school	162.5	57.4	81	21.74	non-smokers	5.2	2.22	2.84	no
716	male	44	junior high school	174	98	101	32.37	current smokers	5	4.74	0.98	no
717	male	58	primary school	158.5	60.4	78	24.04	current smokers	5.7	1.79	1.06	no
718	male	69	primary school	152	55	79	23.81	non-smokers	5.3	1.32	1.3	no
719	male	42	junior high school	169.5	85.5	95	29.76	non-smokers	5.8	0.32	1.41	no
720	male	37	junior high school	168.5	72.6	85	25.57	non-smokers	5.5	0.88	1.34	no
721	male	64	junior high school	177	85.8	100	27.39	non-smokers	4.6	2.25	1.54	no
722	male	60	junior high school	168.51	79.8	97	28.1	previous smokers	5.1	1.1	1.44	no
723	male	17	junior high school	172	60	71	20.28	non-smokers	4.5	1.25	1.16	no
724	male	62	primary school	158	55	85	22.03	current smokers	5.3	0.75	1.72	no
725	male	26	university or higher	170	66	80	22.84	current smokers	4.27	1.35	2	no
726	male	45	primary school	167	92	111	32.99	non-smokers	5.1	2.29	0.66	no
727	male	27	university or higher	176.5	98	100	31.46	non-smokers	5.4	1.71	1.26	no
728	male	29	senior high school	164	77	88	28.63	current smokers	5.2	6.68	0.74	no
729	male	49	primary school	173	91.5	102	30.6	current smokers	4.9	4.23	1.39	no
730	male	34	junior high school	164	67	84	24.91	current smokers	6.33	3.92	1.46	no
731	male	53	junior high school	170	73	89	25.26	current smokers	5	1.25	1	no
732	male	67	illiteracy	163	53	83	19.95	current smokers	6	1.56	1.54	no
733	male	38	junior high school	175	59	78	19.27	current smokers	3.9	0.68	3.16	no
734	male	71	primary school	167	71.5	92	25.64	non-smokers	5.5	1.47	1.21	no
735	male	45	junior high school	166	67	86	24.31	non-smokers	5.8	2.75	1.42	no
736	male	43	junior high school	174.5	92.9	111	30.51	current smokers	5.9	5.34	0.89	no
737	male	39	junior high school	180	60.5	76	18.67	non-smokers	6.1	2.05	1.96	no
738	male	65	junior high school	166	58	80	21.05	non-smokers	5.6	1.11	1.67	no
739	male	29	senior high school	167.5	55.2	70	19.67	non-smokers	5.6	0.97	2.74	no
740	male	39	primary school	175.5	90.8	105	29.48	non-smokers	5	0.9	1.14	no
741	male	26	university or higher	193.5	105.2	87	28.1	current smokers	5.6	3.46	3.15	no
742	male	44	junior high school	158	82.5	103	33.05	previous smokers	5.4	2.62	2.77	no
743	male	43	junior high school	166	74.5	96	27.04	current smokers	5.1	4.52	0.7	no
744	male	47	junior high school	158	73	98	29.24	non-smokers	5.6	7.17	0.88	no
745	male	54	primary school	160	67	75	26.17	non-smokers	5.4	1.09	2.07	no
746	male	31	primary school	169.5	79.2	87	27.57	current smokers	5.1	1.63	1.01	no
747	male	55	junior high school	172	69	79	23.32	current smokers	5.3	1.56	1.35	no
748	male	57	senior high school	182.5	84.8	96	25	current smokers	4.6	1.17	2.55	no
749	male	62	junior high school	168.5	62.8	77	22.12	current smokers	4.1	1.04	3.5	no
750	male	33	senior high school	165	54	70	19.83	non-smokers	4	0.78	1.9	no
751	male	88	primary school	153	51	89	21.79	non-smokers	4.76	0.79	1.29	no
752	male	59	primary school	160	77.7	99.5	30.35	previous smokers	5.5	3.2	0.98	no
753	male	47	junior high school	167	80.1	91	28.72	non-smokers	7.6	0.58	1.21	no
754	male	53	junior high school	167	76	94	27.25	current smokers	4.8	1.24	1.45	no
755	male	30	junior high school	179.5	67.5	74.5	20.95	non-smokers	5.2	1.9	1.34	no
756	male	51	junior high school	168	73	84	25.86	previous smokers	6.4	1.71	1.08	no
757	male	28	junior high school	160	73	63	28.52	current smokers	4.9	2.14	0.91	no
758	male	45	junior high school	163	58.5	77	22.02	current smokers	5.7	0.62	1.29	no
759	male	54	junior high school	174	64.1	77	21.17	previous smokers	5.8	1.34	1.01	no
760	male	20	senior high school	175	98	102	32	current smokers	4.8	2.55	1.13	no
761	male	40	primary school	165	64	84	23.51	current smokers	5.3	0.66	1.71	no
762	male	56	senior high school	169	80	100	28.01	current smokers	5.6	2.53	1.23	no
763	male	25	junior high school	178	80	86	25.25	current smokers	4.9	1.16	1.41	no
764	male	28	junior high school	170.5	92.5	98	31.82	current smokers	6	3.89	0.77	no
765	male	54	primary school	173	88.3	82	29.5	previous smokers	6.1	1.24	1.09	no
766	male	26	junior high school	165.5	70.5	96	25.74	current smokers	3.9	1.99	1.41	no
767	male	53	junior high school	174	69.9	63	23.09	current smokers	11.9	4.92	1.32	no
768	male	46	junior high school	171	60	67	20.52	current smokers	5.4	1.25	1.5	no
769	male	47	primary school	172	78	90	26.37	current smokers	4.3	1.19	0.99	no
770	male	16	primary school	167	80	98	28.69	non-smokers	5.3	4.37	1.14	no
771	male	60	primary school	165.5	72.4	94	26.43	non-smokers	3.7	0.89	1.32	no
772	male	28	senior high school	165.5	66.7	84	24.35	current smokers	5.2	0.87	1.3	no
773	male	41	primary school	175	83.1	100	27.13	current smokers	4	2.33	1.59	no
774	male	48	senior high school	180	96	98	29.63	non-smokers	5.3	6.37	1.76	no
775	male	57	junior high school	164	64	79	23.8	non-smokers	6.4	0.97	1.13	no
776	male	51	primary school	178.5	77.9	93.5	24.45	current smokers	5.9	2.1	0.99	no
777	male	49	junior high school	178.5	71.6	84.5	22.47	current smokers	5	0.81	1.37	no
778	male	56	junior high school	158	59	81	23.63	current smokers	5.8	0.77	1.08	no
779	male	61	junior high school	168	55.7	71	19.73	current smokers	4.7	0.63	1.99	no
780	male	29	junior high school	167.5	67.4	81	24.02	non-smokers	4.6	1.49	1.1	no
781	male	81	junior high school	158	80	104	32.05	current smokers	5.2	1.76	1.39	no
782	male	51	senior high school	174	76.8	91	25.37	non-smokers	3.8	2.17	1.85	no
783	male	28	senior high school	169.5	93.4	103	32.51	current smokers	5.4	2.91	0.92	no
784	male	30	senior high school	172	66	92	22.31	non-smokers	3.7	0.65	1.38	no
785	male	48	junior high school	172.5	77	94	25.88	current smokers	5	2.2	1.12	no
786	male	69	primary school	163	66	84	24.84	current smokers	5.4	0.93	1.74	no
787	male	78	primary school	167	66	87	23.67	current smokers	5	1.01	1.69	no
788	male	41	junior high school	170	63	75	21.8	current smokers	5.9	0.53	2.05	no
789	male	35	primary school	181.5	88.1	102	26.74	current smokers	5.1	1.56	1.42	no
790	male	17	primary school	180	54	67	16.67	non-smokers	3.6	0.63	1.55	no
791	male	40	junior high school	176	69.2	84	22.34	non-smokers	4.6	0.99	1.06	no
792	male	57	junior high school	173	66	84	22.05	current smokers	5.7	0.93	1.03	no
793	male	57	junior high school	177.5	79.3	98	25.17	current smokers	4.9	4.03	1.04	no
794	male	40	primary school	176	75	90	24.21	current smokers	5.3	2.33	1.41	no
795	male	80	primary school	164	75	92	27.89	previous smokers	5.1	1.42	1.24	no
796	male	73	primary school	166	70	92	25.4	non-smokers	5.1	1.24	1.7	no
797	male	39	junior high school	173	77.3	79	25.83	previous smokers	5.1	1.1	1.16	no
798	male	58	junior high school	161	58	78	22.38	non-smokers	5.2	0.5	2.45	no
799	male	78	primary school	150	54.2	80	24.09	non-smokers	5.9	2.37	1.34	no
800	male	24	university or higher	179	59.3	90	18.5	non-smokers	5.2	0.77	1.58	no
801	male	54	senior high school	176.5	83	96	26.64	current smokers	5.4	4.45	1.72	no
802	male	41	junior high school	162	78.7	93	29.99	non-smokers	6.8	3.38	0.6	no
803	male	22	junior high school	169.5	62.7	74	21.82	non-smokers	4.7	1.96	1.45	no
804	male	61	primary school	165	84	105	30.85	current smokers	5.7	1.8	0.95	no
805	male	67	junior high school	173	68	85	22.72	previous smokers	5.6	1.61	1.11	no
806	male	62	illiteracy	164	61.9	85	23.01	current smokers	5.3	2.8	1.67	no
807	male	47	senior high school	187	78	91	22.31	current smokers	4.8	0.89	2.11	no
808	male	35	junior high school	163	73	93	27.48	current smokers	5.3	4.44	0.73	no
809	male	47	junior high school	155	65	86	27.06	non-smokers	3.9	1.23	1.18	no
810	male	31	senior high school	177	85	98	27.13	non-smokers	4.9	4.15	3.15	no
811	male	59	junior high school	153.5	64.5	88	27.37	previous smokers	5	0.6	1.58	no
812	male	33	junior high school	165	59	75	21.67	non-smokers	3.9	7.74	1.64	no
813	male	65	primary school	158	62.6	90	25.08	current smokers	5.3	1.54	0.69	no
814	male	45	junior high school	170.5	70	86.5	24.08	current smokers	4.9	0.86	1.23	no
815	male	52	junior high school	168.5	81.1	96	28.56	non-smokers	5.6	2.62	0.88	no
816	male	63	primary school	165	68	79	24.98	current smokers	4.9	0.96	1.63	no
817	male	36	junior high school	175.5	59.1	70.5	19.19	current smokers	5.6	0.67	1.49	no
818	male	67	primary school	165	55	78	20.2	current smokers	5.3	1.47	1.51	no
819	male	22	junior high school	170.5	56.8	68	19.54	current smokers	5.2	0.9	1.54	no
820	male	51	junior high school	163.5	58.9	71	22.03	current smokers	5	1.2	1.92	no
821	male	41	junior high school	165	80	97	29.38	current smokers	4.1	2.7	1.68	no
822	male	56	junior high school	165	69	86	25.34	non-smokers	4.8	1.15	1.58	no
823	male	30	junior high school	178	70	83	22.09	non-smokers	4.3	0.5	1.38	no
824	male	40	junior high school	165.5	71.3	82	26.03	current smokers	5.2	1.48	1.14	no
825	male	52	junior high school	175.5	80.7	86	26.2	current smokers	5	1.66	0.92	no
826	male	46	junior high school	168	85	91	30.12	current smokers	6.2	5.24	0.65	no
827	male	25	junior high school	179	73.6	85	22.97	non-smokers	4.9	0.59	1.76	no
828	male	52	primary school	164	75	87	27.89	previous smokers	4.9	1.14	1.52	no
829	male	26	junior high school	178	90	96	28.41	non-smokers	4	0.61	1.33	no
830	male	58	junior high school	167	84.7	104	30.37	non-smokers	4.4	1.05	2.86	no
831	male	47	junior high school	172	79.6	92	26.91	current smokers	5	1.3	1.21	no
832	male	81	illiteracy	168	58	80	20.55	non-smokers	6.8	1.66	3.56	no
833	male	37	senior high school	175	94	107	30.69	current smokers	3.5	2.45	1.04	no
834	male	20	junior high school	168	65	75	23.03	current smokers	4.8	1.86	1.19	no
835	male	57	junior high school	178	72	82	22.72	current smokers	6.4	1.9	1.32	no
836	male	40	junior high school	168	70	85	24.8	current smokers	5.8	4.41	0.73	no
837	male	46	junior high school	158	70	98	28.04	non-smokers	4.8	1.53	0.95	no
838	male	40	junior high school	167	66.4	85	23.81	current smokers	4.4	2.31	0.92	no
839	male	39	junior high school	163.5	93.7	106	35.05	current smokers	4.8	5.93	0.97	no
840	male	63	junior high school	165.4	79	91	28.88	non-smokers	5.9	0.65	2.14	no
841	male	32	junior high school	167.5	61.3	75	21.85	current smokers	5.6	1.27	2.05	no
842	male	42	junior high school	170	81	92	28.03	current smokers	5.4	1.2	1.12	no
843	male	63	junior high school	163	70	86	26.35	previous smokers	4.9	0.67	1.64	no
844	male	51	senior high school	166	78	93	28.31	non-smokers	5.3	3.22	0.78	no
845	male	35	senior high school	164.5	75.3	86	27.83	current smokers	4.8	1.31	1.23	no
846	male	35	junior high school	170.5	49	70	16.86	non-smokers	6	0.86	1.08	no
847	male	32	junior high school	176	71	78	22.92	non-smokers	5.1	1.39	1.25	no
848	male	47	primary school	165.5	71	110	25.92	current smokers	5.1	2.46	1.1	no
849	male	58	junior high school	156	70	96	28.76	non-smokers	5.1	1.55	1.25	no
850	male	43	primary school	167	80	97	28.69	current smokers	3.6	1.06	0.99	no
851	male	45	junior high school	170.5	74.9	83	25.8	non-smokers	5.1	1.31	1.45	no
852	male	36	primary school	177.5	64.3	70	20.41	current smokers	4.8	0.75	1.34	no
853	male	37	junior high school	169.5	83.6	91	29.1	current smokers	6.13	1.4	0.75	no
854	male	27	senior high school	178	86	89	27.14	current smokers	5.57	1.02	1.29	no
855	male	38	junior high school	175.5	81.6	92	26.4	current smokers	5.3	2.21	0.89	no
856	male	26	senior high school	178	82	86	25.88	previous smokers	4.7	0.44	1.32	no
857	male	60	primary school	165	74	92	27.18	previous smokers	4.9	2.92	1.2	no
858	male	59	junior high school	171	80.1	93	27.39	current smokers	4.9	1.65	1.62	no
859	male	64	primary school	164	77	104	28.63	previous smokers	5.8	2.67	1.73	no
860	male	17	senior high school	175	51.9	74	16.95	non-smokers	4.2	0.71	1.6	no
861	male	21	university or higher	173	85.6	94	28.6	non-smokers	4.3	2.89	0.74	no
862	male	43	senior high school	164.5	65.9	84	24.35	current smokers	5.1	0.69	1.44	no
863	male	30	junior high school	167.5	76.5	86	27.27	current smokers	5.6	1.8	1.8	no
864	male	31	junior high school	167	70	83	25.1	non-smokers	5.3	2.26	1.65	no
865	male	29	junior high school	170	82	92	28.37	current smokers	5.5	3.17	0.93	no
866	male	24	senior high school	170	76.4	91	26.44	non-smokers	5.4	0.94	1.36	no
867	male	47	primary school	163	61	78	22.96	current smokers	5.6	1.52	1.19	no
868	male	51	primary school	167.5	83.9	94	29.9	non-smokers	4.8	2.25	1.26	no
869	male	59	illiteracy	164	66	72	24.54	non-smokers	5	0.94	1.69	no
870	male	43	junior high school	171.5	98.5	107	33.49	non-smokers	7.9	1.6	1.34	no
871	male	19	university or higher	174.5	86.8	84	28.51	non-smokers	5.6	1.38	1.11	no
872	male	48	junior high school	174	80.7	92	26.65	previous smokers	5.3	1.06	1.66	no
873	male	35	primary school	165	70	86	25.71	current smokers	3.9	1.58	1.15	no
874	male	42	primary school	173.5	90.2	95	29.96	non-smokers	6.1	3.45	0.6	no
875	male	71	primary school	168	55	72	19.49	non-smokers	5.1	1.12	1.34	no
876	male	55	junior high school	167	68.5	90	24.56	current smokers	5.2	1.02	1.02	no
877	male	57	junior high school	168	70	83	24.8	current smokers	4.9	3.57	0.79	no
878	male	62	junior high school	152.5	58.5	86	25.15	previous smokers	5.6	2	0.83	no
879	male	55	junior high school	168	83	95	29.41	previous smokers	4.8	3.02	0.8	no
880	male	56	junior high school	177	72	77	22.98	current smokers	6.3	0.67	1.72	no
881	male	49	junior high school	172.5	61.5	77	20.67	current smokers	5.2	1.5	1.69	no
882	male	43	junior high school	162	71.9	93	27.4	non-smokers	5.8	3.92	0.92	no
883	male	42	junior high school	168.5	60.5	78	21.31	current smokers	4.4	1.18	1.26	no
884	male	40	junior high school	170	65	78	22.49	non-smokers	5.3	1.16	1.63	no
885	male	40	junior high school	163	70	93	26.35	current smokers	4.5	1.8	1.51	no
886	male	50	junior high school	173	69	93	23.05	previous smokers	5.3	1.82	0.97	no
887	male	24	senior high school	178	63.7	82	20.1	current smokers	5.7	2.1	2.4	no
888	male	63	primary school	167	71	99	25.46	non-smokers	5.6	3.37	0.91	no
889	male	52	junior high school	170.5	74.2	92	25.52	previous smokers	5.4	0.88	1.11	no
890	male	49	junior high school	166	73	81	26.49	current smokers	5.5	1.22	1.34	no
891	male	47	primary school	171.5	63.3	89	21.52	current smokers	5.6	0.84	1.58	no
892	male	32	primary school	165	68	98	24.98	current smokers	5.3	1.08	2.36	no
893	male	36	junior high school	169.5	73.2	98	25.48	current smokers	5.4	1.61	0.88	no
894	male	70	unspecified	163.5	53.4	73	19.98	non-smokers	5.5	0.65	1.92	no
895	male	54	junior high school	162	71.5	94	27.24	previous smokers	6.2	4.97	0.91	no
896	male	48	junior high school	162	65	75	24.77	current smokers	5.8	5.93	1.5	no
897	male	32	senior high school	145	51	79	24.26	current smokers	5.5	1.31	1.13	no
898	male	54	illiteracy	168	90	103	31.89	non-smokers	4.5	2.1	1.38	no
899	male	32	junior high school	159	74	98	29.27	current smokers	5.3	1.37	1.65	no
900	male	42	junior high school	172.5	64.8	80	21.8	current smokers	5.4	1.09	1.59	no
901	male	57	primary school	190	103.8	107	28.75	non-smokers	5.8	1.13	1.07	no
902	male	16	senior high school	179.5	56.4	73	17.5	non-smokers	4.9	0.45	1.58	no
903	male	33	junior high school	170.5	74.9	85	25.77	non-smokers	4.7	2.56	0.65	no
904	male	58	junior high school	162	70	91	26.67	current smokers	5.4	1.81	1.64	no
905	male	34	junior high school	170.5	57	75	19.61	current smokers	5	0.77	1.36	no
906	male	50	junior high school	176	65	86	20.98	current smokers	5.5	1.01	1.48	no
907	male	58	primary school	160	72.5	98	28.32	previous smokers	5.6	1.88	1.11	no
908	male	21	junior high school	165	61	75	22.41	non-smokers	5.2	0.77	1.08	no
909	male	59	primary school	165.5	66	96	24.1	current smokers	5.2	2.83	0.63	no
910	male	68	primary school	176	66	86	21.3	current smokers	5.4	2.28	1.85	no
911	male	40	junior high school	172.5	85.7	99	28.8	current smokers	5.2	2.29	2.14	no
912	male	20	senior high school	174	59.2	74	19.55	non-smokers	4.9	1.13	1.42	no
913	male	41	senior high school	173	90	100	30.07	current smokers	5.1	4.87	0.95	no
914	male	68	junior high school	167	68	102	24.38	previous smokers	5.1	0.96	1.89	no
915	male	56	junior high school	166	74	90	26.85	current smokers	5	5.12	1.14	no
916	male	23	senior high school	183	87	91	25.98	current smokers	5.2	2.01	0.99	no
917	male	41	primary school	164.5	64.1	82	23.69	non-smokers	5.2	2.81	1.09	no
918	male	33	junior high school	175	80	98	26.12	current smokers	5.3	0.86	1.79	no
919	male	21	junior high school	180	67	76	20.68	current smokers	5.7	0.71	1.98	no
920	male	33	junior high school	170	81	107	28.03	current smokers	5.5	1.66	1.14	no
921	male	35	junior high school	173.5	100.6	110	33.42	non-smokers	5.1	1.92	1.2	no
922	male	41	primary school	172.5	78.4	98	26.35	non-smokers	5.63	4.47	1.67	no
923	male	60	primary school	161	67	90	25.85	non-smokers	5	4.8	1.15	no
924	male	23	junior high school	181	74	82	22.59	current smokers	4.6	1.47	1.26	no
925	male	52	primary school	168.5	78	88	27.47	previous smokers	5.1	1.63	1.62	no
926	male	46	junior high school	180	82	91	25.31	non-smokers	4.8	2.83	0.85	no
927	male	24	university or higher	183	63.8	78	19.05	previous smokers	5.2	0.69	1.2	no
928	male	45	junior high school	175.5	76	93	24.68	current smokers	5.6	1.83	1.46	no
929	male	54	primary school	166	75.2	85	27.29	current smokers	5.3	1.73	3.15	no
930	male	66	senior high school	163	76	102	28.6	previous smokers	6.3	2.88	2.93	no
931	male	46	primary school	169	82.3	100	28.82	non-smokers	4.8	0.81	1.19	no
932	male	27	senior high school	175	78.9	95	25.76	non-smokers	4.1	1.31	1.26	no
933	male	55	junior high school	155	67	84	27.8	non-smokers	5.3	2.18	1.54	no
934	male	62	primary school	162	50.7	64	19.32	non-smokers	6.3	1.76	1.34	no
935	male	40	senior high school	164.5	60.6	82	22.39	current smokers	5	2.11	1.29	no
936	male	29	university or higher	175	74	86	24.16	non-smokers	4.9	1.6	1.14	no
937	male	44	junior high school	163	51	82	19.2	current smokers	4.3	0.71	1.99	no
938	male	52	primary school	161.5	73.9	96	28.33	non-smokers	5.7	1.46	0.97	no
939	male	27	university or higher	168	55	74	19.49	current smokers	5.3	1.08	0.93	no
940	male	48	junior high school	181	73.9	84	22.56	previous smokers	5.7	0.42	1.89	no
941	male	20	junior high school	170.5	85	90	29.24	non-smokers	5.3	1.33	1.75	no
942	male	44	primary school	167	67	78	24.02	current smokers	6	0.83	1.42	no
943	male	53	junior high school	163	73	89	27.48	non-smokers	4.8	1.02	1.24	no
944	male	50	junior high school	163.5	71.2	93	26.63	current smokers	5.6	3.02	1.01	no
945	male	47	junior high school	165	85	100	31.22	current smokers	5.4	4.84	0.81	no
946	male	15	senior high school	168	44	56	15.59	non-smokers	5.7	0.5	1.56	no
947	male	49	junior high school	170.5	91.9	107	31.61	previous smokers	4.9	1.33	1.14	no
948	male	53	junior high school	162.5	52.7	75	19.96	non-smokers	5.3	1.67	1.27	no
949	male	22	junior high school	175	69	80	22.53	current smokers	4.6	1	1.13	no
950	male	46	junior high school	169	75.5	88	26.43	current smokers	4.6	1.73	1.14	no
951	male	60	primary school	175	51	84	16.65	current smokers	3.9	1.36	1.36	no
952	male	50	primary school	173.5	58.8	75	19.53	current smokers	5.3	1.18	1.93	no
953	male	47	junior high school	172	81	88	27.38	current smokers	4.6	6.29	0.69	no
954	male	44	primary school	157.5	59.9	82	24.15	current smokers	6.17	2.87	1.26	no
955	male	28	junior high school	180	76	85	23.46	current smokers	4.26	0.65	1.46	no
956	male	55	primary school	169	85	98	29.76	non-smokers	3.96	0.83	1.67	no
957	male	43	junior high school	167.5	60.8	80	21.67	current smokers	5.7	0.78	1.73	no
958	male	53	primary school	169	82	95	28.71	current smokers	4.4	1.05	1.05	no
959	male	71	junior high school	170	91	101	31.49	non-smokers	5.7	3.09	3.04	no
960	male	81	junior high school	160	66	91	25.78	non-smokers	5.6	2.08	1.87	no
961	male	32	junior high school	170	84.7	107	29.3	current smokers	4.2	5.51	1.82	no
962	male	54	junior high school	164	73	95	27.14	current smokers	6.1	1.67	0.94	no
963	male	40	junior high school	173	75	80	25.06	current smokers	4.2	0.92	1.61	no
964	male	48	junior high school	171	89	103	30.44	non-smokers	5	2	1.59	no
965	male	58	junior high school	169	52	68	18.21	current smokers	5.3	1.98	1.47	no
966	male	46	junior high school	171	62.9	71	21.51	current smokers	5.1	0.93	1.38	no
967	male	61	junior high school	171	74	89	25.31	current smokers	5.2	1.34	2.29	no
968	male	31	junior high school	178	59	74	18.62	current smokers	4.1	0.77	1.68	no
969	male	41	primary school	170	67	95	23.18	non-smokers	3.9	2.83	1.5	no
970	male	35	junior high school	172.5	83.5	91	28.06	current smokers	5.7	6.85	1.09	no
971	male	46	junior high school	171	59	72	20.18	current smokers	5	4.07	1.54	no
972	male	63	primary school	166	55	76	19.96	non-smokers	4.4	1.56	1.47	no
973	male	48	primary school	166	85.2	106	30.92	current smokers	6.2	3.7	1.07	no
974	male	55	junior high school	168	74	85	26.22	non-smokers	5.8	1.33	1.1	no
975	male	27	senior high school	181	75	78	22.89	current smokers	5.1	0.71	1.34	no
976	male	17	primary school	174.5	60.6	70	19.9	non-smokers	5.7	0.71	1.03	no
977	male	28	university or higher	169.5	83.1	91	28.92	current smokers	4.7	2.91	2.43	no
978	male	54	primary school	174	77	84	25.43	current smokers	4	1.04	2.45	no
979	male	28	junior high school	176	64.4	72	20.79	current smokers	5.8	1.19	1.02	no
980	male	60	junior high school	152.5	64.4	98	27.69	non-smokers	6	2	1.42	no
981	male	30	junior high school	173	72	85	24.06	non-smokers	4.5	1.5	1.13	no
982	male	48	junior high school	167	88	97	31.55	current smokers	6	5.54	0.79	no
983	male	60	primary school	166.5	74.4	92	26.84	current smokers	5.6	1.57	1.08	no
984	male	47	senior high school	168	64	84	22.68	current smokers	5.1	0.86	1.63	no
985	male	23	senior high school	176	88	95	28.41	current smokers	3.6	2.81	1.2	no
986	male	25	primary school	170	75	85	25.95	non-smokers	4.3	3.2	1.31	no
987	male	50	illiteracy	163	64.3	89	24.2	non-smokers	5.3	2.19	1.12	no
988	male	44	junior high school	172	68	83	22.99	non-smokers	4.2	0.68	1.42	no
989	male	54	junior high school	183	68	83	20.31	current smokers	5.3	1.08	1.32	no
990	male	40	junior high school	172.5	72.2	86	24.26	current smokers	5.3	2.84	0.98	no
991	male	47	junior high school	178	103	107	32.51	current smokers	5.3	1.65	0.8	no
992	male	48	senior high school	176	72.7	85	23.47	current smokers	5.1	0.84	2.58	no
993	male	22	junior high school	175	83	98	27.1	non-smokers	5.9	2.24	1.85	no
994	male	43	junior high school	182	101.2	100	30.55	non-smokers	5.4	1.48	1.53	no
995	male	56	senior high school	166.5	72.5	94	26.15	current smokers	5.3	1.49	1.08	no
996	male	66	senior high school	163	76	107	28.6	current smokers	6	0.47	1.79	no
997	male	53	senior high school	172	82	89	27.72	current smokers	4.8	3.24	0.93	no
998	male	41	junior high school	174	75	88	24.77	current smokers	5.3	0.37	1.67	no
999	male	29	junior high school	173.5	73.8	85	24.52	non-smokers	5.6	3.18	0.89	no
1000	male	63	primary school	174	78	87	25.76	current smokers	5.6	2.24	0.92	no
1001	male	27	senior high school	180	83	97	25.61	current smokers	3.9	1.47	0.88	no
1002	male	69	illiteracy	159	65	90	25.71	current smokers	5.3	1.31	1.71	no
1003	male	40	junior high school	167	64	76	22.95	current smokers	5.2	1.23	1.08	no
1004	male	50	primary school	160	71	91	27.73	previous smokers	6.2	1.31	1.05	no
1005	male	56	junior high school	173	70	88	23.39	non-smokers	5.6	1.58	0.8	no
1006	male	26	senior high school	177.5	78.9	88	25.04	current smokers	4.9	2.06	0.67	no
1007	male	40	junior high school	161.5	78.7	96	30.17	current smokers	5.1	1.73	1.29	no
1008	male	31	junior high school	186	90.5	90	26.16	current smokers	4.9	2.03	1.02	no
1009	male	57	illiteracy	170	74	85	25.61	previous smokers	5.3	1.83	1.18	no
1010	male	58	junior high school	168	61	89	21.61	current smokers	5	0.56	1.51	no
1011	male	61	primary school	164.5	68.5	92.5	25.31	current smokers	5.4	0.87	1.33	no
1012	male	56	junior high school	164	52	84	19.33	non-smokers	3.8	5.62	1.63	no
1013	male	29	senior high school	175	72	86	23.51	non-smokers	5.7	0.75	1.45	no
1014	male	19	senior high school	178	60	77	18.94	non-smokers	3.6	0.67	1.54	no
1015	male	62	junior high school	161	48.3	73	18.63	current smokers	5.9	0.41	1.59	no
1016	male	43	primary school	161.5	82	98	31.44	non-smokers	5.9	1	1.59	no
1017	male	28	junior high school	171	64	82	21.89	previous smokers	5	1.7	2.45	no
1018	male	29	junior high school	166	65	70	23.59	non-smokers	5.1	1.79	1.42	no
1019	male	50	junior high school	172	76	85	25	current smokers	5.6	2.03	1.63	no
1020	male	52	junior high school	176	77.8	100	25.12	non-smokers	5.4	1.16	1.04	no
1021	male	33	senior high school	178.5	93.2	97	29.25	current smokers	4.7	1.52	0.85	no
1022	male	34	junior high school	171	84.8	93	29	current smokers	5.9	1.8	1.6	no
1023	male	39	junior high school	170	74	82	25.61	current smokers	5.7	1.01	1.03	no
1024	male	22	junior high school	186	75	76	21.68	current smokers	4.2	0.88	1.53	no
1025	male	61	junior high school	173	63	67	21.05	current smokers	4.7	0.94	1.13	no
1026	male	52	junior high school	170	68	79	23.53	current smokers	5.6	2.66	1.52	no
1027	male	61	primary school	164	54.5	76	20.26	current smokers	5.1	1.22	1	no
1028	male	53	primary school	167.5	56	71	19.96	non-smokers	4.5	0.99	1.29	no
1029	male	76	primary school	168	84	98	29.76	non-smokers	4.9	1.09	2.98	no
1030	male	59	primary school	170	57	73	19.72	current smokers	5.4	0.88	1.66	no
1031	male	49	junior high school	171	82.3	100	28.15	previous smokers	5.7	2.29	0.73	no
1032	male	53	junior high school	170	77	86	26.64	non-smokers	5.1	0.52	1.7	no
1033	male	39	junior high school	167.5	68.8	84	24.52	non-smokers	5.2	1.42	0.91	no
1034	male	63	junior high school	164	80	93	29.74	current smokers	5.7	1.57	1.3	no
1035	male	56	junior high school	175	72.5	84	23.67	non-smokers	5.7	0.72	1.56	no
1036	male	50	senior high school	166.5	70.4	87	25.39	current smokers	4.9	1.31	0.99	no
1037	male	43	junior high school	169	82.6	92	28.92	current smokers	4.7	3.01	1.12	no
1038	male	49	junior high school	162	51	74	19.43	current smokers	4.8	1.7	1.54	no
1039	male	42	junior high school	175	81	94	26.45	current smokers	5.7	4.39	1.3	no
1040	male	55	junior high school	169	76	88	26.61	current smokers	5.4	0.74	1.65	no
1041	male	42	junior high school	175	72	80	23.51	current smokers	4.9	0.94	1.36	no
1042	male	49	primary school	169.5	74.9	90	26.07	previous smokers	4.9	1.03	1.67	no
1043	male	40	primary school	168	55.5	75	19.66	current smokers	5.1	1.58	1.13	no
1044	male	20	junior high school	182.5	63.3	74	19.01	non-smokers	5.4	1.24	1.59	no
1045	male	19	senior high school	163	50	64	18.82	non-smokers	4.5	2.32	4.43	no
1046	male	27	junior high school	184	85	92	25.11	current smokers	4.6	1.15	1.83	no
1047	male	42	primary school	168	82	95	29.05	current smokers	3.7	2.29	1.46	no
1048	male	56	junior high school	158	70	88	28.04	non-smokers	5.2	0.99	1.52	no
1049	male	47	primary school	167	68	90	24.38	current smokers	5.5	0.83	1.23	no
1050	male	53	junior high school	174.5	91.8	94	30.15	previous smokers	6.8	6.18	0.78	no
1051	male	35	junior high school	168.5	71.5	84	25.18	current smokers	4.8	2.34	1.15	no
1052	male	64	primary school	175	76.1	98	24.85	current smokers	4.8	1.56	1.26	no
1053	male	18	senior high school	180.5	74.1	81	22.74	non-smokers	5.2	0.5	1.34	no
1054	male	43	junior high school	181	84.8	97	25.9	current smokers	4.9	1.92	1.36	no
1055	male	49	junior high school	170.5	81.6	97	28.07	current smokers	5.9	2.24	0.93	no
1056	male	59	junior high school	169	71.8	87	25.14	non-smokers	4.6	0.95	1.13	no
1057	male	26	university or higher	181	77	100	23.5	non-smokers	4.6	3.07	2.37	no
1058	male	54	junior high school	173	81.3	99	27.2	previous smokers	5.3	1.28	1.17	no
1059	male	23	senior high school	172	57	71	19.27	non-smokers	4.8	0.62	3.83	no
1060	male	23	senior high school	158.5	69.1	89	27.5	current smokers	5.3	2.68	1.33	no
1061	male	53	junior high school	166	78	90	28.31	non-smokers	4.3	2.91	1.76	no
1062	male	39	junior high school	182	82	100	24.76	non-smokers	4.9	1.27	1.08	no
1063	male	67	primary school	165	82.7	95	30.38	previous smokers	5	3.34	0.98	no
1064	male	47	junior high school	160.5	82	105	31.83	previous smokers	4.7	1.59	1.41	no
1065	male	55	junior high school	180.5	90.5	101	27.78	current smokers	5.5	4.84	0.8	no
1066	male	50	primary school	168	59	74	20.9	current smokers	5.5	0.8	1.3	no
1067	male	35	junior high school	176.5	70.6	89	22.66	non-smokers	5.2	0.89	1.09	no
1068	male	49	primary school	183.5	81.9	96	24.32	current smokers	5.9	2.84	0.09	no
1069	male	46	primary school	173.5	78	100	25.91	current smokers	5.1	3.67	0.47	no
1070	male		junior high school	182	87	80	26.26	non-smokers	5.3	1.08	3.45	no
1071	male	55	junior high school	170	75	88	25.95	non-smokers	5.4	1.79	3.25	no
1072	male	44	junior high school	163	67.2	80	25.29	current smokers	5.3	1.58	4.56	no
1073	male	47	unspecified	179	78	101	24.3	current smokers	5.2	4.1	1.63	no
1074	male	26	senior high school	184.5	93.7	91	27.53	non-smokers	5.3	0.95	1.29	no
1075	male	54	junior high school	167	73.8	91	26.46	previous smokers	5.2	0.69	0.99	no
1076	male	64	junior high school	170	86.8	100	30.03	non-smokers	5.2	6.58	3.15	no
1077	male	35	junior high school	175	82	96	26.78	current smokers	4.6	1.22	1.55	no
1078	male	52	junior high school	171	83.5	100	28.56	non-smokers	4.4	1.8	1.69	no
1079	male	26	university or higher	176	70	82	22.6	current smokers	5	2.6	1.17	no
1080	male	53	primary school	164	66	78	24.54	non-smokers	5.2	0.93	0.99	no
1081	male	46	junior high school	176	75	94	24.21	current smokers	5.2	1.22	1.65	no
1082	male	20	senior high school	183	93	101	27.77	non-smokers	4.6	1.52	1.4	no
1083	male	68	unspecified	160	86	116	33.59	previous smokers	5.6	3.15	1.81	no
1084	male	58	junior high school	163.5	61.7	82	23.08	current smokers	6.1	3.15	1.05	no
1085	male	29	junior high school	165	61.3	74.5	22.52	current smokers	4.9	0.8	1.25	no
1086	male	41	junior high school	169	84.8	102	29.69	current smokers	4	2.34	1.02	no
1087	male	47	junior high school	177	89	96	28.41	non-smokers	5.7	1.93	3.1	no
1088	male	69	senior high school	164	64	80	23.8	current smokers	4.5	1.38	1.63	no
1089	male	78	primary school	156	54	74	22.19	non-smokers	4.9	0.5	1.67	no
1090	male	51	primary school	167.5	77.7	97	27.69	non-smokers	5.2	1.71	1.06	no
1091	male	35	primary school	169	83	119	29.06	non-smokers	4.8	1.22	1.05	no
1092	male	58	primary school	160	53	75	20.7	non-smokers	5.5	1.27	1.78	no
1093	male	43	junior high school	174	92	108	30.39	current smokers	3.5	1.63	0.88	no
1094	male	77	illiteracy	164	52	67	19.33	current smokers	5.9	1.64	1.13	no
1095	male	64	junior high school	170	87.4	95	29.9	current smokers	4.3	2.12	1.97	no
1096	male	40	junior high school	169	69.9	82	24.47	non-smokers	4.9	1.49	1.69	no
1097	male	47	junior high school	165	65.4	90	24.02	current smokers	4.6	2.84	1.7	no
1098	male	45	primary school	167	80	91	28.69	current smokers	5.9	1.8	1.84	no
1099	male	27	senior high school	170.5	70	75	24.08	non-smokers	5.4	0.72	1.94	no
1100	male	47	primary school	149.5	60.4	82	27.02	non-smokers	5.3	1.79	1.55	no
1101	male	29	senior high school	168	63	78	22.6	non-smokers	5	1.34	1.57	no
1102	male	62	unspecified	165	69	78	25.34	non-smokers	4.3	0.67	0.95	no
1103	male	51	primary school	168	65	76	23.03	non-smokers	5.2	0.76	1.98	no
1104	male	55	senior high school	167.5	80.6	90	28.73	non-smokers	5.6	1.25	1.29	no
1105	male	59	primary school	170	66.8	84	23.11	previous smokers	4.9	1.33	0.88	no
1106	male	44	illiteracy	170.5	80.8	94	27.79	current smokers	5.6	1.11	1.37	no
1107	male	39	junior high school	172	75.5	90	25.52	non-smokers	5.1	1.64	1.12	no
1108	male	61	primary school	163	61.5	81	23.15	non-smokers	4.6	1.05	1.49	no
1109	male	35	university or higher	172	66	85	22.31	non-smokers	4.8	1.27	1.18	no
1110	male	27	university or higher	169.5	58.2	77	20.26	non-smokers	4.9	0.58	2.01	no
1111	male	45	junior high school	161.5	65.5	86	25.11	current smokers	5	0.92	1.17	no
1112	male	63	primary school	162.5	61.5	87	23.29	current smokers	4.6	0.83	1.28	no
1113	male	44	junior high school	171	87.9	98	30.06	current smokers	4.9	1.3	0.82	no
1114	male	56	junior high school	163.5	57	76	21.32	previous smokers	5.9	0.63	1.64	no
1115	male	33	junior high school	163.5	64.4	78.6	24.09	current smokers	4.6	2.1	1.81	no
1116	male	24	junior high school	187	91	116	26.02	non-smokers	4.6	1.06	1.7	no
1117	male	62	junior high school	169	69.5	82	24.33	non-smokers	4.3	6.58	1.55	no
1118	male	51	primary school	161	58.5	81	22.57	non-smokers	5	3.16	0.72	no
1119	male	52	primary school	162	59	76	22	current smokers	5.4	1.38	1.83	no
1120	male	60	junior high school	170	72	88	24.91	non-smokers	4.7	0.59	2.28	no
1121	male	66	primary school	173	70	73	23.39	current smokers	5.3	1.56	1.24	no
1122	male	53	senior high school	176	86.4	92	27.89	non-smokers	5.9	2.64	0.69	no
1123	male	18	senior high school	177	61.4	67	19.6	non-smokers	4.6	1.18	0.95	no
1124	male	43	junior high school	171	82.5	97	28.21	non-smokers	7.2	6.53	0.24	no
1125	male	39	primary school	175.5	83.4	92	27.08	non-smokers	5.9	0.84	1.55	no
1126	male	70	primary school	181.5	77.8	92	23.62	non-smokers	4.9	1.38	1.55	no
1127	male	55	senior high school	169.5	91.5	105	31.85	current smokers	5.9	5.94	1.13	no
1128	male	63	primary school	173	78.3	85	26.16	non-smokers	8.8	1.63	1.63	no
1129	male	50	junior high school	171	67.2	79	22.98	current smokers	5.1	1.27	1.14	no
1130	male	51	junior high school	161	55	74	21.22	non-smokers	4.9	2.31	1.79	no
1131	male	46	junior high school	177	75	75	23.94	current smokers	5.1	0.94	1.41	no
1132	male	72	primary school	165	78	92	28.65	non-smokers	5.8	1.43	1.41	no
1133	male	35	junior high school	167	67	71	24.02	current smokers	4.1	0.82	1.59	no
1134	male	38	junior high school	180	84.5	94	26.08	current smokers	5.8	0.92	1.13	no
1135	male	26	unspecified	164	63	71	23.42	non-smokers	5.6	0.85	1.88	no
1136	male	44	junior high school	164	62	87	23.05	current smokers	5	0.91	1.37	no
1137	male	44	junior high school	174	70	83	23.12	current smokers	5	1.89	1.41	no
1138	male	59	junior high school	158	55	79	22.03	current smokers	5.4	1.18	2.54	no
1139	male	47	primary school	163	68.3	89	25.71	previous smokers	4.1	2.72	1.04	no
1140	male	28	junior high school	181	77.2	82	23.56	current smokers	4.7	1.32	1.58	no
1141	male	24	senior high school	186.5	97	98	27.89	non-smokers	5.6	1.96	0.55	no
1142	male	19	primary school	178	79.3	89	25.03	non-smokers	4.6	1.08	1.44	no
1143	male	26	senior high school	176	70	72	22.6	non-smokers	5.3	0.98	1.2	no
1144	male	53	junior high school	167	62	81	22.23	previous smokers	5.1	0.95	1.18	no
1145	male	35	junior high school	175	79.2	92	25.86	current smokers	5	1.49	1.64	no
1146	male	32	senior high school	172	82	112	27.72	non-smokers	5.2	2.18	1.01	no
1147	male	72	primary school	155.5	51.9	80	21.46	current smokers	8.1	1.43	1.51	no
1148	male	20	senior high school	173	71	77	23.72	non-smokers	5.4	0.51	2.67	no
1149	male	65	junior high school	156	63	86	25.89	current smokers	6.2	0.8	1.46	no
1150	male	25	senior high school	165	76	92	27.92	non-smokers	4.9	1.07	0.98	no
1151	male	35	primary school	170	83	93	28.72	current smokers	3.7	0.81	1.25	no
1152	male	42	senior high school	174.5	73	78	23.97	non-smokers	5.6	0.66	1.46	no
1153	male	37	senior high school	183.5	89.3	94	26.52	current smokers	5.7	1.43	1.43	no
1154	male	39	junior high school	166	82	97	29.76	current smokers	5.5	2.32	1.28	no
1155	male	31	senior high school	178	66.3	74	24	non-smokers	5.2	0.72	1.29	no
1156	male	67	junior high school	159	69	95	27.29	non-smokers	5.1	2.93	2.13	no
1157	male	30	junior high school	177.5	77.2	92	24.5	current smokers	5.8	2.22	0.92	no
1158	male	40	junior high school	174.5	83.3	103	27.36	current smokers	5	1.35	1.16	no
1159	male	28	senior high school	169	80	90	28.01	current smokers	5	1.8	1.09	no
1160	male	54	junior high school	169	70	84	24.51	non-smokers	5.1	2.31	1.19	no
1161	male	48	junior high school	179	85.1	96	26.56	non-smokers	5	2.06	1.1	no
1162	male	32	junior high school	174	73	89	24.11	non-smokers	5.2	2.23	0.83	no
1163	male	67	primary school	169	69	92	24.16	non-smokers	5	1.06	1.41	no
1164	male	46	primary school	174	70	92	23.12	current smokers	5.4	0.82	1.83	no
1165	male	24	senior high school	170	69.1	74	23.91	non-smokers	4.7	0.28	3.64	no
1166	male	62	primary school	173	57.5	74.5	19.21	current smokers	5.7	1.21	1.66	no
1167	male	42	junior high school	172	86	96	29.07	current smokers	5	4.16	0.99	no
1168	male	78	illiteracy	145	80.2	110	38.15	non-smokers	5.1	2.14	0.98	no
1169	male	25	senior high school	170.5	71.8	85	24.7	current smokers	5.4	1.24	0.9	no
1170	male	20	senior high school	161.5	53.8	63	20.63	current smokers	4.9	0.76	1.61	no
1171	male	56	senior high school	169.5	76.8	89	26.73	previous smokers	5.6	0.72	1.26	no
1172	male	46	junior high school	175	74.4	96	24.29	current smokers	4.9	5.41	1.83	no
1173	male	58	primary school	157	68	90	27.59	non-smokers	5	1.95	1.09	no
1174	male	32	senior high school	170.5	63.9	81	21.98	non-smokers	4.6	2.03	1.31	no
1175	male	63	junior high school	162	70.1	85	26.71	non-smokers	5.1	1.13	1.44	no
1176	male	62	illiteracy	155	78.8	96	32.8	non-smokers	6.4	2.35	1.16	no
1177	male	51	primary school	168	54	75	19.13	current smokers	4.9	0.9	1.91	no
1178	male	44	junior high school	176.5	77.2	87	24.78	non-smokers	5.1	1.12	1.35	no
1179	male	24	senior high school	176	89.7	90	28.96	non-smokers	5.5	4.58	1	no
1180	male	28	primary school	172	61.3	67	20.72	current smokers	5.4	1.38	1.27	no
1181	male	62	primary school	152	50	84	21.64	current smokers	5.8	0.9	1.06	no
1182	male	46	junior high school	166	62.2	84	22.57	current smokers	5.5	1.59	1.59	no
1183	male	53	junior high school	183.5	99.5	110	29.55	non-smokers	5.4	0.82	1.19	no
1184	male	32	junior high school	171	71.2	84	24.35	current smokers	4.7	1.58	1.12	no
1185	male	64	primary school	159.5	66	77	25.94	non-smokers	7.3	1.02	1.21	no
1186	male	41	junior high school	170.5	80	96	27.52	current smokers	6.3	1.52	0.97	no
1187	male	17	primary school	172	50	59	16.9	current smokers	4.3	1.1	1.08	no
1188	male	48	junior high school	164.5	61.7	73	22.8	current smokers	5.4	1.27	1.42	no
1189	male	34	primary school	176.5	80.1	89	25.71	non-smokers	5.8	1.4	1.05	no
1190	male	57	primary school	174	71.3	92	23.55	non-smokers	5.4	0.56	1.78	no
1191	male	35	primary school	162	60	75	22.86	non-smokers	4.7	0.49	1.52	no
1192	male	50	junior high school	173	84	105	28.07	non-smokers	4.3	2.85	1.76	no
1193	male	40	junior high school	173	66	78	22.05	non-smokers	3.9	1.39	1.82	no
1194	male	45	junior high school	172.5	74	95	24.87	non-smokers	5.6	2.05	0.84	no
1195	male	42	primary school	167	56	82	20.08	non-smokers	3.5	0.72	1.31	no
1196	male	50	primary school	165	60	109	22.04	current smokers	4.6	0.82	1.89	no
1197	male	38	primary school	169.5	61.7	84	21.48	current smokers	5.1	0.86	1.33	no
1198	male	31	university or higher	175	90	96	29.39	current smokers	5.3	4.69	0.82	no
1199	male	54	primary school	165.5	56.1	72	20.48	current smokers	4.7	1.31	1.16	no
1200	male	54	junior high school	160	87	105	33.98	previous smokers	4.9	2.39	1.35	no
1201	male	69	primary school	168	68	83	24.09	non-smokers	4.3	2.22	4.31	no
1202	male	54	junior high school	173	78	90	26.06	previous smokers	5.2	0.72	1.43	no
1203	male	37	primary school	176	95	105	30.67	non-smokers	4.4	1.9	1.08	no
1204	male	50	primary school	169.5	83.2	102	28.96	current smokers	5	2.13	0.52	no
1205	male	18	senior high school	174.5	82.1	83	26.96	current smokers	4.8	0.54	1.15	no
1206	male	19	senior high school	168.5	59.6	70.5	20.99	non-smokers	5.6	1.26	1.46	no
1207	male	62	primary school	180	97.7	104	30.15	non-smokers	5.2	2.61	1.36	no
1208	male	44	junior high school	174	66	86	21.8	non-smokers	4.7	1.99	1.75	no
1209	male	28	junior high school	168.5	48.4	74	17.05	non-smokers	5.5	0.42	1.76	no
1210	male	45	primary school	168	73.2	90	25.94	non-smokers	6.6	1.3	1.04	no
1211	male	42	primary school	173	62	79	20.72	current smokers	3.9	0.89	1.37	no
1212	male	28	junior high school	185.5	88.3	82	25.66	current smokers	5.8	1.25	1.12	no
1213	male	64	primary school	171	70	86	23.94	non-smokers	5.1	1.71	1.47	no
1214	male	46	primary school	175	78.6	100	25.67	current smokers	5.3	2.23	0.92	no
1215	male	59	junior high school	176.5	78.4	95	25.17	current smokers	5	1.29	3.95	no
1216	male	41	university or higher	172.5	59.2	73	19.89	current smokers	5	0.61	1.66	no
1217	male	42	junior high school	173	89	108	29.74	current smokers	4.9	1.47	2.64	no
1218	male	61	senior high school	166	74	96	26.5	current smokers	4.6	1.02	1.07	no
1219	male	75	primary school	164	57	77	21.19	non-smokers	5.5	1.92	1.86	no
1220	male	44	junior high school	176	86.9	100	28.05	non-smokers	5.3	3.71	1.82	no
1221	male	66	illiteracy	179	59	73	18.41	current smokers	4.9	0.9	2.24	no
1222	male	51	junior high school	170	55	67	19.03	current smokers	5.8	0.68	1.45	no
1223	male	64	primary school	165	66	89	24.2	non-smokers	5	2.06	1.71	no
1224	male	51	junior high school	168	71	80	25.16	current smokers	6	1.09	1.64	no
1225	male	43	primary school	172	64	73	21.63	non-smokers	3.5	0.91	1.2	no
1226	male	54	junior high school	173	66.4	76	22.19	current smokers	4.8	1.12	1.87	no
1227	male	38	junior high school	172	94	98	31.77	current smokers	5	1.56	1.49	no
1228	male	31	senior high school	176	75.4	87	24.34	non-smokers	4.8	1.69	1.54	no
1229	male	62	junior high school	175	75	86	24.49	current smokers	5.2	0.74	1.04	no
1230	male	53	senior high school	175.5	82.8	102	26.88	non-smokers	5.5	1.17	0.7	no
1231	male	48	senior high school	163	62.9	91	23.67	current smokers	5.1	2.53	1.92	no
1232	male	45	senior high school	177.5	74.5	87	23.65	current smokers	4.9	0.7	1.21	no
1233	male	42	illiteracy	161.5	56.9	73	21.82	non-smokers	5.6	0.31	1.32	no
1234	male	61	junior high school	170	84	81	29.07	non-smokers	5.4	2.83	2.04	no
1235	male	42	primary school	171.5	62.2	81	21.15	current smokers	5.2	0.73	1.63	no
1236	male	47	junior high school	177	65.9	79	21.03	current smokers	5.3	1.72	1.16	no
1237	male	45	junior high school	166	70.6	86	25.62	non-smokers	5.3	0.74	1.98	no
1238	male	43	junior high school	164.5	57.7	79	21.32	current smokers	5.6	1.33	1.12	no
1239	male	38	primary school	167.5	78.9	93	28.12	current smokers	4.8	2.15	0.89	no
1240	male	49	junior high school	173.5	72.8	82	24.18	current smokers	5.6	1.89	0.79	no
1241	male	61	primary school	175	64	78	20.9	current smokers	5.5	0.77	1.71	no
1242	male	67	junior high school	173	60.5	86	20.21	current smokers	4	0.92	1.44	no
1243	male	36	junior high school	175	84	105	27.43	current smokers	3.5	2.01	1.28	no
1244	male	35	junior high school	171	69	78	23.6	current smokers	4.2	0.7	1.32	no
1245	male	41	junior high school	179	85	98	26.53	non-smokers	4.5	0.68	1.08	no
1246	male	47	primary school	175.5	66.2	94	21.49	current smokers	4.7	0.92	1.33	no
1247	male	32	senior high school	173	74	90	24.73	non-smokers	5.4	2.16	2.88	no
1248	male	48	primary school	181	104	105	31.75	current smokers	4.9	1.59	0.96	no
1249	male	18	senior high school	173	92.5	93	30.91	non-smokers	4.8	1.05	1.07	no
1250	male	61	primary school	167	75.2	97	26.96	non-smokers	5.2	1.13	1.38	no
1251	male	25	junior high school	169	64	83	22.41	current smokers	5.3	2.89	0.95	no
1252	male	58	primary school	175.5	73.5	77	23.86	current smokers	4.5	0.58	1.26	no
1253	male	64	junior high school	166	50	71	18.14	current smokers	6.7	1.25	1.43	no
1254	male	47	junior high school	176	84	98	27.12	current smokers	5.4	1.83	1.61	no
1255	male	48	junior high school	161.5	76.4	90	29.29	current smokers	4.8	3.93	0.55	no
1256	male	42	junior high school	157.5	51.8	66	20.88	non-smokers	4.9	1.09	1.79	no
1257	male	50	junior high school	180	89	86	27.47	current smokers	5.3	1.29	1.27	no
1258	male	40	primary school	178	85	95	26.83	current smokers	5.3	4.46	1.07	no
1259	male	36	junior high school	170	76	80	26.3	non-smokers	5.8	2.16	1.03	no
1260	male	63	primary school	166.5	65.1	77	23.48	non-smokers	11.2	1.04	1.42	no
1261	male	61	junior high school	162.5	66.3	92	25.11	current smokers	5.3	3.94	5.59	no
1262	male	16	primary school	181	74.7	83	22.8	current smokers	4.6	1.51	1.41	no
1263	male	64	junior high school	166	71.6	85	25.98	current smokers	4.9	1.54	2.36	no
1264	male	45	primary school	172	80	91	27.04	previous smokers	5.2	2.74	0.94	no
1265	male	50	junior high school	180	91	109	28.1	current smokers	5	2.25	1.64	no
1266	male	31	university or higher	174.5	94.1	105	30.9	current smokers	4.5	1.01	1.62	no
1267	male	64	primary school	164.5	70.6	89	26.09	non-smokers	5.5	1.42	1.65	no
1268	male	52	junior high school	165	59	71	21.67	current smokers	5	1.43	2.37	no
1269	male	27	senior high school	170	79	84	27.34	non-smokers	4.12	1.84	1	no
1270	male	44	junior high school	170	70.1	84	24.26	non-smokers	6.2	1.19	1.28	no
1271	male	75	primary school	161	62	87	23.92	non-smokers	5.5	1.23	1.16	no
1272	male	37	senior high school	174.5	78.1	97	25.65	current smokers	4.6	2.69	0.75	no
1273	male	31	junior high school	180	91	110	28.09	current smokers	5.1	0.63	1.14	no
1274	male	46	junior high school	173	77.5	86	25.89	current smokers	4.8	1.05	1.63	no
1275	male	26	senior high school	169	62	72	21.71	current smokers	5.1	1.35	2.41	no
1276	male	37	senior high school	172	66	76	22.31	non-smokers	6.1	0.99	0.86	no
1277	male	34	senior high school	178	75.6	91	23.86	non-smokers	5.7	1.76	1.31	no
1278	male	33	junior high school	173	86	112	28.73	current smokers	5.1	1.59	1.08	no
1279	male	80	illiteracy	166	60	82	21.77	current smokers	4.3	5.03	1.23	no
1280	male	42	primary school	162.5	49.7	74	18.82	current smokers	4.9	0.99	1.33	no
1281	male	62	junior high school	164	95	107	35.32	current smokers	6.3	3.44	0.99	no
1282	male	58	junior high school	161.5	60.5	79	23.2	non-smokers	5.4	0.94	1.41	no
1283	male	32	junior high school	160.5	49.8	68	19.33	non-smokers	4.9	0.46	1.3	no
1284	male	75	junior high school	159	50.5	82	19.98	current smokers	4.4	1.48	1.71	no
1285	male	46	junior high school	172	87.6	94	29.61	previous smokers	4.8	2.93	2.47	no
1286	male	36	senior high school	164	65	89	24.17	non-smokers	5.7	2.05	1.64	no
1287	male	33	junior high school	180.5	68.6	81	21.06	non-smokers	4.9	2.99	0.81	no
1288	male	37	junior high school	177	63	73	20.11	current smokers	4.9	2.61	1.81	no
1289	male	64	junior high school	180.5	101.5	116	31.15	previous smokers	5.3	2.1	0.76	no
1290	male	38	junior high school	170.5	75.6	93	26.01	previous smokers	4.3	1.29	1.72	no
1291	male	46	senior high school	176	72	98	23.24	non-smokers	4	4.47	1.08	no
1292	male	45	junior high school	159.5	64.3	85	25.27	non-smokers	5.2	2.1	1.56	no
1293	male	53	senior high school	164	59.8	86	22.23	non-smokers	4.7	1.39	1.77	no
1294	male	57	illiteracy	166.5	64.5	85	23.27	non-smokers	5.2	1.35	1.15	no
1295	male	53	junior high school	180	88	104	27.16	current smokers	5.3	1.12	1.6	no
1296	male	27	junior high school	171.5	87.5	96	29.75	current smokers	4.8	2.86	1.07	no
1297	male	59	primary school	159.5	51.4	67	20.2	current smokers	5.3	0.56	1.9	no
1298	male	25	unspecified	173	55.3	88	18.48	current smokers	5.1	1.27	1.15	no
1299	male	45	primary school	163	66	79	24.84	non-smokers	5.4	1.59	1.56	no
1300	male	52	senior high school	169.5	74.2	85	25.83	current smokers	5.4	1.94	3.15	no
1301	male	43	primary school	159	68.4	87	27.06	current smokers	5.8	4.98	1	no
1302	male	30	senior high school	158	55	76	22.03	current smokers	5.5	1.43	1.16	no
1303	male	28	senior high school	172.5	62.9	73	21.14	current smokers	4.5	1.39	1.78	no
1304	male	64	primary school	154.5	47.2	65	19.77	current smokers	6	0.53	1.58	no
1305	male	26	senior high school	174	78.8	95	26.03	current smokers	6	2.26	1.21	no
1306	male	52	primary school	169	91.5	104	32.04	current smokers	5.1	0.88	1.12	no
1307	male	38	junior high school	167.5	88.2	102	31.44	non-smokers	5.4	2.54	0.53	no
1308	male	49	primary school	160	59	76	23.05	non-smokers	4.5	0.39	1.12	no
1309	male	33	senior high school	174	82	89	27.08	non-smokers	5.3	1.45	2.15	no
1310	male	52	junior high school	171.5	72	94	24.48	current smokers	5.5	1.14	1.05	no
1311	male	39	junior high school	170.5	64.2	73	22.08	non-smokers	5.9	1.47	1.47	no
1312	male	43	junior high school	169.5	74.8	89	26.04	current smokers	4.7	1.07	1.12	no
1313	male	67	junior high school	167.5	68.8	85	24.52	non-smokers	5	1.27	1.16	no
1314	male	45	junior high school	169	81	93	28.36	current smokers	5.1	1.73	2.69	no
1315	male		junior high school	164	42.2	68	15.69	non-smokers	5.6	1.498	1.61	no
1316	male	60	junior high school	160	72	94	28.13	non-smokers	5.3	1.25	1.79	no
1317	male	25	senior high school	183	92	95	27.47	current smokers	4.8	1.65	1.27	no
1318	male	35	senior high school	177.5	72.6	81	23.04	current smokers	4.4	0.93	1.26	no
1319	male	20	senior high school	178.5	67	81	21.03	non-smokers	5.3	1.23	1.35	no
1320	male	48	junior high school	157	56	71	22.72	current smokers	5.4	0.71	4.21	no
1321	male	43	junior high school	163	74.5	90	28.04	current smokers	5.4	10.67	1.24	no
1322	male	45	senior high school	164	65.3	84	24.28	non-smokers	5.3	3.64	1.29	no
1323	male	46	junior high school	170	69	88	24	non-smokers	5.4	1.26	1.73	no
1324	male	30	senior high school	181	75.8	79	23.1	current smokers	5.5	0.87	1.51	no
1325	male	50	junior high school	178	75.2	96	23.73	non-smokers	5.3	2.81	1.35	no
1326	male	43	junior high school	172.5	72.5	91	24.36	current smokers	5.4	0.89	1.44	no
1327	male	48	primary school	159	75.1	78	29.71	current smokers	5.3	1	0.9	no
1328	male	48	primary school	165	57.4	75	21.08	current smokers	4.9	0.33	1.59	no
1329	male	21	senior high school	173.5	101.7	101	33.78	current smokers	5.4	2.58	0.71	no
1330	male	30	senior high school	176	76	82	24.54	non-smokers	5.7	2.16	1.82	no
1331	male	35	junior high school	166	78	90	28.31	non-smokers	4.5	0.86	1.61	no
1332	male	48	junior high school	170	82	94	28.37	current smokers	5.5	5.66	0.91	no
1333	male	41	junior high school	166	66	87	23.95	current smokers	5.3	3.5	2.72	no
1334	male	27	university or higher	188	95	97	26.88	non-smokers	4.9	3.63	3.52	no
1335	male	30	junior high school	178.5	86.7	108	30.3	non-smokers	2	1.44	1.3	no
1336	male	40	junior high school	171	63	79	21.55	current smokers	5.2	1.19	1.54	no
1337	male	61	primary school	171.5	62.9	86	21.4	non-smokers	3.6	0.55	1.37	no
1338	male	30	junior high school	165.5	58.4	72	21.3	current smokers	5.6	1.46	1.12	no
1339	male	17	junior high school	168	53	70	18.8	non-smokers	5.1	1.95	1.8	no
1340	male	44	junior high school	159	75.1	105	29.71	current smokers	4.9	0.48	0.86	no
1341	male	53	junior high school	159.5	63.2	85	24.84	current smokers	5.8	2.41	1.08	no
1342	male	29	junior high school	170	72.8	82	25.19	current smokers	6.1	1.19	0.88	no
1343	male	58	senior high school	172	58	82	19.7	current smokers	5.7	1.75	1.83	no
1344	male	25	junior high school	156	70	90	28.76	current smokers	5.1	2.02	1.28	no
1345	male	49	junior high school	167	56	77	20.08	current smokers	5.5	1.77	1.03	no
1346	male	69	primary school	165	56	90	20.57	non-smokers	5.7	0.9	1.02	no
1347	male	56	primary school	162	76	98	2.67	previous smokers	5.4	2.83	1.13	no
1348	male	40	junior high school	174	95	115	31.38	current smokers	5.6	5.57	1	no
1349	male	24	senior high school	172	81.1	102	27.4	current smokers	5.7	10.07	3.99	no
1350	male	59	primary school	165	69.2	82	25.42	non-smokers	4.9	0.96	1.45	no
1351	male	73	junior high school	160	58	77	22.66	current smokers	5.4	1.97	1.91	no
1352	male	23	junior high school	175	83.7	90	27.33	current smokers	5.1	1.55	1.23	no
1353	male	63	primary school	159	66.3	81	26.23	non-smokers	5	2.17	1.08	no
1354	male	53	junior high school	178	86.2	98	27.21	current smokers	3.7	2.51	1.59	no
1355	male	40	senior high school	159.5	74.5	91	29.28	current smokers	4.9	1.05	1.7	no
1356	male	44	junior high school	173	66.5	88	22.22	previous smokers	5.1	0.66	1.41	no
1357	male	67	primary school	170	65	88	22.49	non-smokers	3.9	1.4	1.32	no
1358	male	49	junior high school	167	70	88	25.1	current smokers	4.4	1.7	0.83	no
1359	male	74	illiteracy	155	55.4	87	23.06	non-smokers	5.6	1.37	1.02	no
1360	male	54	junior high school	178	70.7	79	22.31	current smokers	5	1.21	3.49	no
1361	male	64	primary school	163	70	80	26.35	previous smokers	4.7	1.47	1.18	no
1362	male	41	senior high school	172	76	93	25.69	current smokers	5.3	4.34	0.73	no
1363	male	38	junior high school	176.5	82	94	26.32	current smokers	4.6	1.13	0.94	no
1364	male	27	university or higher	176	70	79	22.6	current smokers	4.6	2.39	2.04	no
1365	male	51	junior high school	156	59	87	24.24	current smokers	5.3	0.93	1.81	no
1366	male	24	university or higher	176	88.1	103	28.44	non-smokers	4.6	1.42	2.36	no
1367	male	57	senior high school	169	84	104	29.41	non-smokers	15.3	4.14	2.17	no
1368	male	49	senior high school	168	68	76	24.1	current smokers	4.8	1.13	1.36	no
1369	male	23	senior high school	188	82	96	23.2	non-smokers	5.9	1.49	0.99	no
1370	male	64	primary school	175	74.5	95	24.33	non-smokers	4.2	1.83	0.99	no
1371	male	27	junior high school	176.5	70	77.5	22.47	current smokers	5.4	1.84	1.52	no
1372	male	58	primary school	165	60	86	22.03	current smokers	6.1	1.53	1.7	no
1373	male	18	junior high school	165	69.9	79	25.67	non-smokers	4.9	0.8	0.9	no
1374	male	49	junior high school	161	71.9	94	27.74	non-smokers	5.3	9.73	1.88	no
1375	male	36	junior high school	178.5	92.9	104	29.2	current smokers	5.4	3.24	1.93	no
1376	male	51	primary school	172	86	88	29.07	non-smokers	5.3	0.77	1.55	no
1377	male	54	senior high school	170	80	100	27.68	non-smokers	4.8	1.45	1.12	no
1378	male	47	junior high school	166.5	64.8	79	23.37	non-smokers	4.9	2.65	1.38	no
1379	male	54	junior high school	165	80	101	29.38	current smokers	5.9	2.68	0.99	no
1380	male	39	junior high school	175.5	78.5	94	25.49	current smokers	5.3	1.53	1.16	no
1381	male	63	primary school	171.5	65	95	22.1	non-smokers	4.8	0.89	1.33	no
1382	male	40	primary school	174	87.5	93	28.9	non-smokers	5.6	0.91	1.56	no
1383	male	78	illiteracy	172	64	89	23	non-smokers	5.1	1.18	1.02	no
1384	male	45	junior high school	173	69	83	23.05	current smokers	5.3	0.79	1.62	no
1385	male	69	primary school	160	71	90	27.73	non-smokers	4.6	0.87	3.07	no
1386	male	50	primary school	170.5	83.3	100	28.65	current smokers	5.3	0.71	1.23	no
1387	male	66	primary school	165	71	85	26.08	previous smokers	5.3	1.13	1.41	no
1388	male	34	university or higher	170	62	76	21.45	current smokers	5.4	1.45	1.75	no
1389	male	65	primary school	163	72.8	92	27.4	non-smokers	6.3	1.74	1.01	no
1390	male	62	primary school	163	65	83	24.46	previous smokers	5.5	2.12	1.67	no
1391	male	55	junior high school	172	71	89	23.9	current smokers	5.3	1.81	0.63	no
1392	male	55	junior high school	170.5	83.9	97	28.86	non-smokers	5.2	1.27	1.16	no
1393	male	19	senior high school	174.5	59.7	82	19.61	non-smokers	5.2	1.15	1.29	no
1394	male	82	primary school	167	65	88	23	previous smokers	5.1	2.22	1.46	no
1395	male	64	junior high school	159	53.4	88	21.12	current smokers	5.3	0.94	1.75	no
1396	male	42	junior high school	176.5	83.5	91	26.8	non-smokers	5.3	0.51	1.71	no
1397	male	36	junior high school	179.5	84	78	26.07	current smokers	5	1.06	0.92	no
1398	male	49	junior high school	177	76.5	99	24.42	non-smokers	5.3	2.07	1.75	no
1399	male	27	senior high school	174	65.7	75	21.7	non-smokers	4.8	1.4	1.23	no
1400	male	55	primary school	160.5	51	71	19.8	current smokers	5.6	1.97	1.07	no
1401	male	28	university or higher	178	56	65	17.67	non-smokers	5.4	0.34	1.88	no
1402	male	49	junior high school	176	76.7	94	24.76	non-smokers	5.5	2.43	0.97	no
1403	male	82	junior high school	166.5	66.1	80	23.84	non-smokers	7.3	1.44	1.1	no
1404	male	29	junior high school	176	70	81	22.6	non-smokers	5.9	0.96	1.82	no
1405	male	50	junior high school	172	83	99	28.06	non-smokers	5.1	1.89	1.33	no
1406	male	46	junior high school	170.5	55.5	68	19.09	non-smokers	5.7	1.58	1.76	no
1407	male	61	primary school	155.5	59.2	86	24.48	current smokers	5.6	1.78	1.29	no
1408	male	58	junior high school	170	75.6	86	26.16	current smokers	5.3	0.92	1.69	no
1409	male	70	illiteracy	167.5	66.7	83	23.77	current smokers	5.4	1.13	1.3	no
1410	male	47	junior high school	170.5	80.5	106	27.69	current smokers	5.6	2.87	1.7	no
1411	male	50	junior high school	162.5	59.4	80	22.5	current smokers	4.3	0.84	1.49	no
1412	male	41	junior high school	176	94.5	104	30.51	current smokers	5.6	1.68	1.27	no
1413	male	40	junior high school	177.5	86.7	94	27.52	non-smokers	4.5	1.83	0.93	no
1414	male	53	junior high school	172	65	85	21.97	current smokers	5.42	0.8	1.82	no
1415	male	40	senior high school	161.5	73.4	90	28.14	non-smokers	4.6	1.14	3.15	no
1416	male	27	junior high school	166.3	50.9	64	18.4	current smokers	5.6	1.13	1.47	no
1417	male	55	senior high school	166	69.5	90	25.22	current smokers	4.4	0.93	3.15	no
1418	male	48	primary school	174	82.1	86	27.12	non-smokers	5.6	1.54	1.05	no
1419	male	68	junior high school	165.5	69	96	25.19	non-smokers	4.3	1.26	2.59	no
1420	male	53	junior high school	163	79	94	29.73	non-smokers	5	0.65	2.15	no
1421	male	46	junior high school	173.5	82	95	27.24	non-smokers	5.1	1.13	1.09	no
1422	male	66	primary school	162	53	73	20.2	current smokers	5.3	0.89	1.75	no
1423	male	17	senior high school	171	47.8	81	16.2	non-smokers	5.6	1.29	1.15	no
1424	male	43	junior high school	171	75	90	25.65	current smokers	5.3	2.09	1.87	no
1425	male	73	junior high school	159	64	91	25.32	current smokers	5.6	2.62	1.67	no
1426	male	46	junior high school	177	84.8	90	27.07	current smokers	6.5	0.87	1.49	no
1427	male	18	university or higher	192	75	72	20.35	non-smokers	4.7	2.36	3.12	no
1428	male	18	primary school	179	67.1	74	20.94	current smokers	4.9	0.6	1.11	no
1429	male	49	primary school	175	77	82	25.14	current smokers	4.8	1.3	1.96	no
1430	male	50	junior high school	164.5	78.5	92	29.01	non-smokers	4.8	2.22	1.25	no
1431	male	44	junior high school	167	80.1	92	28.72	current smokers	4.2	1.89	2.8	no
1432	male	59	primary school	157	65	89	26.37	current smokers	5.5	0.62	1.67	no
1433	male	62	primary school	169	68.2	81	23.88	previous smokers	5.3	0.8	1.14	no
1434	male	38	junior high school	168.5	82.8	98	29.16	current smokers	5	1.22	1.39	no
1435	male	63	primary school	159	56.6	80	22.39	non-smokers	4.6	0.81	1.76	no
1436	male	40	senior high school	171	59.8	84	20.5	current smokers	3.9	1.03	1.72	no
1437	male	33	junior high school	166	83	100	30	non-smokers	5.3	1.79	1.68	no
1438	male	26	senior high school	173	57.8	70	19.31	current smokers	5.3	0.55	1.76	no
1439	male	52	primary school	161.5	59.8	77	22.93	current smokers	5.1	0.94	2.77	no
1440	male	15	junior high school	158.8	52.2	66	20.7	non-smokers	5.4	4.71	1.17	no
1441	male	45	senior high school	164	90	104	33.46	current smokers	5.1	1.39	1.25	no
1442	male	41	junior high school	178.5	91.2	101	28.62	non-smokers	5.2	4.75	0.41	no
1443	male	48	junior high school	171.5	68.7	77	23.36	current smokers	5.5	0.45	1.3	no
1444	male	64	primary school	177	78	86	24.9	non-smokers	5.1	1.84	1.71	no
1445	male	54	senior high school	172.5	80	96	26.89	current smokers	4.7	1.66	1.09	no
1446	male	48	primary school	175	62.1	86	20.28	current smokers	5.6	1.47	2.36	no
1447	male	44	junior high school	176.5	88.4	97	28.38	non-smokers	4.8	1.86	1.42	no
1448	male	41	junior high school	168	75.3	101	26.68	current smokers	6.03	3.9	2.03	no
1449	male	49	junior high school	170	71	87	24.57	non-smokers	4.9	0.99	0.9	no
1450	male	61	junior high school	170.5	57.2	73	19.7	current smokers	5.4	1.35	1.87	no
1451	male	50	junior high school	165	56	76	20.57	current smokers	4.6	0.82	1.35	no
1452	male	55	junior high school	170	79	91	27.34	non-smokers	5.3	1.87	1.71	no
1453	male	42	junior high school	153	70	86	29.9	non-smokers	5.3	5.14	3.43	no
1454	male	77	illiteracy	154	68	98	28.67	non-smokers	5.3	1.8	1.18	no
1455	male	44	primary school	179	82	92	25.59	current smokers	5.1	2.99	0.96	no
1456	male	64	primary school	174.5	89.5	97	29.39	non-smokers	5.4	1.21	1.63	no
1457	male	26	senior high school	169.5	72.9	82	25.4	current smokers	5.4	1.48	0.91	no
1458	male	49	primary school	167.5	68.7	89	24.49	non-smokers	5.2	1.26	1.43	no
1459	male	60	primary school	175	81	98	26.45	current smokers	4.7	2.79	1.46	no
1460	male	49	primary school	168	77.8	92	27.57	non-smokers	5.5	1.15	1.35	no
1461	male	44	junior high school	170.5	75.4	95	25.94	current smokers	5	1.96	1.42	no
1462	male	33	senior high school	172.5	69	82	23.19	current smokers	5.1	4.58	0.95	no
1463	male	40	junior high school	176.5	90	101	28.89	current smokers	5	0.91	3.4	no
1464	male	51	junior high school	170	72	78	24.91	current smokers	5.4	1.36	1.3	no
1465	male	51	junior high school	183.5	90.6	105	26.91	non-smokers	5.1	3.04	0.96	no
1466	male	50	junior high school	168	67	72	23.74	current smokers	5.3	0.97	1.48	no
1467	male	45	illiteracy	170	72.8	74	25.19	current smokers	5.7	2.89	2.94	no
1468	male	41	junior high school	175	85	88	27.76	non-smokers	5.3	1.8	2.65	no
1469	male	46	junior high school	166	64.9	81	23.55	current smokers	5.3	1.9	0.84	no
1470	male	51	junior high school	162	68	82	25.91	current smokers	5.6	1.15	3.45	no
1471	male	51	primary school	156	53	74	21.78	current smokers	5.3	1.43	2.27	no
1472	male	50	senior high school	170	75.3	85	26.06	non-smokers	5.3	2.5	2.94	no
1473	male	46	junior high school	162	60	82	22.86	current smokers	5.8	2.56	1.11	no
1474	male	31	junior high school	170	53	71	18.34	current smokers	4.2	0.65	1.51	no
1475	male	27	senior high school	175	76.2	91	24.88	current smokers	4.8	1.18	1.6	no
1476	male	47	junior high school	176.5	94.5	102	30.33	non-smokers	4.8	1.55	1.43	no
1477	male	44	junior high school	177	85	97	27.13	current smokers	5.2	1.71	0.98	no
1478	male	53	primary school	161	76	88	29.32	previous smokers	5.4	0.8	1.32	no
1479	male	52	primary school	174	94	103	31.05	current smokers	4.6	1.25	1.36	no
1480	male	53	junior high school	184	90	96	26.58	current smokers	4.9	2.54	1.04	no
1481	male	52	junior high school	170	70	82	24.2	non-smokers	5.5	2.78	2.64	no
1482	male	42	junior high school	148	52.7	73	24.06	non-smokers	5.2	1.04	1.61	no
1483	male	49	primary school	171	75	92	25.65	non-smokers	4.8	0.82	0.88	no
1484	male	54	senior high school	161.5	68.9	97	26.42	current smokers	4.3	1.81	2.03	no
1485	male	33	junior high school	172	89	101	30.08	current smokers	5.4	0.95	1.68	no
1486	male	39	junior high school	165.5	94.7	113	34.57	current smokers	5.4	1.76	1.33	no
1487	male	43	junior high school	175	80.1	94	26.16	previous smokers	5.8	2.26	0.8	no
1488	male	49	junior high school	177	63	83	20.11	current smokers	5.3	0.74	1.56	no
1489	male	59	junior high school	173.5	87.6	103	29.1	current smokers	5	2.24	1.74	no
1490	male	23	junior high school	178	76.8	91	24.2	non-smokers	4.5	1.99	1.82	no
1491	male	55	primary school	168	69	89	24.45	current smokers	4.4	2.35	1.14	no
1492	male	18	junior high school	172.5	52.3	63	17.58	non-smokers	5.3	0.95	1.17	no
1493	male	29	junior high school	185	79.1	83	23.11	current smokers	4.4	1	1.96	no
1494	male	22	junior high school	165.5	49.1	64	17.93	non-smokers	5.1	0.89	1.57	no
1495	male	49	junior high school	173	93.3	106	31.17	current smokers	6.2	2.29	1.04	no
1496	male	50	junior high school	164	76.9	92	28.59	non-smokers	5.4	0.78	1.13	no
1497	male	52	primary school	166	62.6	78	22.72	current smokers	5.3	1.91	1.1	no
1498	male	24	senior high school	167.5	64	86	22.8	current smokers	5.3	1.78	1.43	no
1499	male	68	primary school	171	94	106	32.15	current smokers	5.9	2.07	1.74	no
1500	male	53	primary school	175.5	93.5	97.5	30.36	current smokers	4.8	1.21	1.49	no
1501	male	50	junior high school	168	92	98	32.6	current smokers	5	1.31	1.29	no
1502	male	44	primary school	169	68	82	23.81	non-smokers	5.6	1.41	2.02	no
1503	male	52	junior high school	174	78	91	25.76	non-smokers	5.9	1.28	1.45	no
1504	male	48	junior high school	177	77	87	24.58	current smokers	7.2	1.96	1.01	no
1505	male	47	junior high school	175	60	72	19.59	non-smokers	5.3	1.22	1.03	no
1506	male	24	junior high school	180	69.1	78	21.33	current smokers	4.8	0.87	1.2	no
1507	male	24	junior high school	168	76.6	86	27.14	current smokers	4.9	1.12	0.94	no
1508	male	18	senior high school	175	65	67	21.22	current smokers	4.8	0.58	1.06	no
1509	male	77	primary school	169	67	87	23.46	current smokers	5.4	1.05	1.65	no
1510	male	69	junior high school	171	62	86	21.2	non-smokers	5	0.56	1.65	no
1511	male	45	primary school	164	72.4	92	26.92	current smokers	5.7	1.12	1.18	no
1512	male	70	primary school	169.5	61	91	21.23	non-smokers	4.1	1.54	1.32	no
1513	male	41	primary school	178	66.7	94	21.05	non-smokers	5.2	1.06	1	no
1514	male	41	junior high school	170	79.8	90	27.6	non-smokers	5.9	1.32	1.85	no
1515	male	64	primary school	169	75.6	86	26.47	non-smokers	5.9	1.55	1.09	no
1516	male	56	primary school	160	72	82	28.13	current smokers	5	1.4	1.35	no
1517	male	20	junior high school	185	65	78	18.99	non-smokers	4.8	1.39	1.18	no
1518	male	16	junior high school	168	68.4	73	24.23	non-smokers	5.2	0.86	0.91	no
1519	male	47	junior high school	171.5	90.7	106	30.84	current smokers	5.9	1.62	1.05	no
1520	male	41	primary school	181	78	99	23.81	non-smokers	3.6	1.41	2.03	no
1521	male	34	junior high school	179	95.9	98	29.9	current smokers	5.1	1.86	1.38	no
1522	male	51	senior high school	165	53	74	19.5	current smokers	4.6	1.71	1.56	no
1523	male	32	junior high school	170.5	77.5	91	26.66	non-smokers	4.3	1.95	1.58	no
1524	male	34	senior high school	166	54	65	19.6	current smokers	5.3	1.75	1.62	no
1525	male	46	junior high school	168	65.7	82	23.28	current smokers	5	2.4	1.97	no
1526	male	28	senior high school	171	67	74	22.91	current smokers	5.1	1.16	1.13	no
1527	male	43	junior high school	166	76	86	27.58	current smokers	5.4	1.31	1.99	no
1528	male	47	junior high school	166.5	69.4	84	25.03	non-smokers	4.9	1.27	1.38	no
1529	male	46	junior high school	164	81.5	95	30.3	current smokers	5.6	2.05	2.45	no
1530	male	37	junior high school	171	67.3	79	23.02	non-smokers	5.9	1.06	1.8	no
1531	male	45	junior high school	175	71	84	23	current smokers	4.9	0.91	1.53	no
1532	male	41	primary school	166.5	68.8	85	24.82	non-smokers	5.9	0.98	1.61	no
1533	male	49	junior high school	162.5	71.8	105	27.19	non-smokers	5	0.77	1.76	no
1534	male	59	junior high school	174	75.3	99	24.87	current smokers	5.5	4.15	0.5	no
1535	male	32	university or higher	173.5	90.1	104	29.93	current smokers	5.2	10.63	0.44	no
1536	male	30	junior high school	178	99	97	31.2	current smokers	4.1	1.39	1.74	no
1537	male	36	junior high school	171	77.3	85	26.44	current smokers	5.1	2.18	0.96	no
1538	male	44	primary school	180	79	70	24.38	non-smokers	4.9	1.28	1.16	no
1539	male	43	primary school	173	75	83	25.06	current smokers	5.2	0.97	1.56	no
1540	male	50	primary school	159	59	87	23.3	current smokers	5.4	7.52	1.03	no
1541	male	53	senior high school	163	54.1	70	20.36	current smokers	4.1	4.48	1.42	no
1542	male	46	primary school	167.5	83.4	102	29.73	non-smokers	5.2	1.12	1.09	no
1543	male	34	senior high school	180	82.5	89	25.46	current smokers	5.4	3.03	0.82	no
1544	male	56	primary school	169	53.8	93	18.84	current smokers	5	3.13	0.9	no
1545	male	65	primary school	168	90	118	31.89	non-smokers	5.4	0.84	1.76	no
1546	male	59	junior high school	167.5	57	70	20.32	current smokers	4.9	0.98	1.36	no
1547	male	48	senior high school	171	72	81	24.62	current smokers	5	1.69	3.88	no
1548	male	68	junior high school	161	68.9	90	26.58	current smokers	5.9	1.64	1	no
1549	male	46	senior high school	165	77	92	28.28	non-smokers	5.3	1.92	1.52	no
1550	male	45	junior high school	168.5	85.5	98	30.11	current smokers	5.7	2.95	0.68	no
1551	male	52	junior high school	179	68	79	21.22	current smokers	6.4	1.53	1.57	no
1552	male	62	primary school	163	65.6	94	24.69	non-smokers	5	2.19	1.72	no
1553	male	58	primary school	160	73.5	85	28.7	non-smokers	4.6	4.06	1.75	no
1554	male	19	junior high school	172.5	56.6	71	19.02	non-smokers	5.3	0.76	2.86	no
1555	male	50	junior high school	163.5	64.4	83	24.09	current smokers	4.2	0.91	1.69	no
1556	male	49	junior high school	175.5	77.9	100	25.29	current smokers	4.5	1.74	1.05	no
1557	male	22	junior high school	182	70	70	21.13	non-smokers	5.4	0.47	1.49	no
1558	male	20	junior high school	163	52.6	71	19.8	current smokers	5.5	1.65	1.17	no
1559	male	24	senior high school	174	90	90	29.73	previous smokers	5.3	0.53	4.14	no
1560	male	33	junior high school	178	64	74	20.2	current smokers	5.4	1.23	1.17	no
1561	male	61	primary school	173	75	80	25.06	non-smokers	4.9	3.96	0.89	no
1562	male	24	primary school	171	65	87	22.23	non-smokers	5	0.92	2.23	no
1563	male	71	junior high school	158	54.4	83	21.79	non-smokers	5.5	5.2	1.28	no
1564	male	32	unspecified	168	66	80	23.38	non-smokers	4.8	0.71	1.74	no
1565	male	38	junior high school	176	73	96	23.57	non-smokers	5.3	1.29	1.06	no
1566	male	40	junior high school	163.5	81.7	101	30.56	current smokers	5.7	1.91	1.81	no
1567	male	70	junior high school	168	74.4	102	26.36	current smokers	4.8	1.03	0.84	no
1568	male	49	primary school	170	75.4	94	26	previous smokers	5.4	2.01	1.24	no
1569	male	18	junior high school	175	63.4	77	20.7	current smokers	5.5	2.07	0.96	no
1570	male	52	junior high school	164	73	95	27.14	current smokers	5.9	1.19	0.94	no
1571	male	42	junior high school	168.5	72	92	25.36	non-smokers	5.3	1.37	1.73	no
1572	male	41	junior high school	170	70.2	92	24.29	non-smokers	3.6	1.19	1.69	no
1573	male	51	junior high school	173	71.8	89	23.99	current smokers	4.3	3.33	1.02	no
1574	male	23	senior high school	165	57.7	77	21.19	non-smokers	3.7	2.7	1.63	no
1575	male	45	junior high school	171	75	82	25.65	current smokers	5.1	1.55	1.2	no
1576	male	36	junior high school	171.5	64.3	90	21.86	non-smokers	4.5	2.24	1.71	no
1577	male	56	junior high school	162	60	90	22.86	current smokers	5	2.3	1.88	no
1578	male	55	junior high school	176	81	94	26.15	previous smokers	5.5	1.29	1.12	no
1579	male	16	senior high school	174	87	102	28.74	non-smokers	5.5	1.11	1.23	no
1580	male	45	junior high school	174.5	87.9	100	28.87	current smokers	5.3	2.16	1.87	no
1581	male	23	senior high school	182	67	71	20.23	current smokers	6.1	0.96	1.22	no
1582	male	18	primary school	176.5	71.9	72	23.08	non-smokers	5.3	1.71	1.65	no
1583	male	40	junior high school	180	81.3	92	25.09	non-smokers	5.9	2.21	0.85	no
1584	male	35	junior high school	176	79.5	88	25.67	current smokers	4.9	1.32	1.2	no
1585	male	53	senior high school	165	67	87	24.61	current smokers	5.3	1.2	1.17	no
1586	male	52	junior high school	176.5	90.8	95	29.15	non-smokers	6.3	1.78	0.99	no
1587	male	44	primary school	155	45	65	18.73	current smokers	5.1	1.43	1.5	no
1588	male	46	junior high school	178.5	79	87	24.79	non-smokers	5.6	1.48	1.4	no
1589	male	54	senior high school	154	55	79	23.2	non-smokers	4.6	1.19	1.35	no
1590	male	50	primary school	169.5	82	92	28.54	current smokers	7	2.14	0.76	no
1591	male	47	junior high school	170	77	92.5	26.64	current smokers	5.5	0.98	1.47	no
1592	male	44	junior high school	168.7	79	98	27.76	current smokers	5.4	5.88	0.72	no
1593	male	53	junior high school	167	74	89	26.53	previous smokers	6	0.86	1.86	no
1594	male	38	junior high school	165	73.2	96	26.89	non-smokers	5.4	2.67	1.06	no
1595	male	40	junior high school	171.5	88.5	101	30.09	previous smokers	5.6	2.99	1.08	no
1596	male	55	primary school	164	62.7	81	23.31	current smokers	5.1	1.5	1.65	no
1597	male	55	illiteracy	165	70	85	25.71	previous smokers	5.2	1.39	1.73	no
1598	male	54	senior high school	167	70.5	92	25.28	current smokers	3.8	4.2	1.82	no
1599	male	49	primary school	174	57.9	75	19.12	current smokers	5.5	0.66	1.14	no
1600	male	47	junior high school	171	59	76	20.18	non-smokers	5.7	0.63	1.3	no
1601	male	52	junior high school	170	82	91	28.37	previous smokers	6.2	3.36	1.03	no
1602	male	56	junior high school	157	58.2	80	23.61	current smokers	5.6	1.97	1.04	no
1603	male	48	primary school	174	73	109	24.11	current smokers	5.2	2.58	0.95	no
1604	male	50	junior high school	168	58	74	20.55	current smokers	5.4	0.86	1.51	no
1605	male	43	primary school	174	86	107	28.41	current smokers	4.9	2.29	1.16	no
1606	male	36	primary school	169	79	93	27.66	current smokers	5.4	1	0.92	no
1607	male	67	primary school	166	75.9	83	27.5	non-smokers	5.5	1.26	1.1	no
1608	male	51	junior high school	170	65	80	22.49	current smokers	5.1	1.05	1.12	no
1609	male	48	primary school	171	55	68	18.81	current smokers	5.1	1.66	1.63	no
1610	male	48	junior high school	173	62.4	75	20.85	current smokers	5.9	1.09	1.11	no
1611	male	62	illiteracy	163	67	86	25.22	non-smokers	7.3	0.36	1.18	no
1612	male	51	junior high school	174	70	86	23.12	previous smokers	6.6	2.14	0.78	no
1613	male	21	senior high school	186.5	59.6	82	17	non-smokers	5	1.55	1.58	no
1614	male	53	junior high school	159	57.4	85	22.7	current smokers	5.9	2.39	0.99	no
1615	male	53	junior high school	161.5	76.7	98	29.41	non-smokers	4.4	2.09	0.67	no
1616	male	41	senior high school	170.5	77.1	87	26.52	current smokers	5.6	1.11	0.78	no
1617	male	36	senior high school	168.5	73.9	85	26.03	current smokers	5.3	0.55	1.81	no
1618	male	27	university or higher	165	66	77	24.24	current smokers	5	2.79	0.89	no
1619	male	26	junior high school	184	95	90	28.06	current smokers	5.3	1.46	1.16	no
1620	male	64	primary school	167.5	70.7	96	25.1	non-smokers	6.2	0.79	1.33	no
1621	male	50	junior high school	168	69	74	24.45	current smokers	4.9	1.44	1.06	no
1622	male	70	primary school	165	70	82	25.71	non-smokers	6	1.76	0.95	no
1623	male	30	junior high school	176	76.3	89	24.63	non-smokers	5	1.88	1	no
1624	male	33	senior high school	163	49.6	66	18.67	current smokers	4.7	1.21	1.41	no
1625	male	35	senior high school	167.5	81.8	92	29.16	previous smokers	6.6	1.36	1.08	no
1626	male	53	senior high school	176.5	64.5	84	20.7	non-smokers	4.4	1.09	1.13	no
1627	male	69	primary school	161.5	56.1	76	21.51	current smokers	6.2	1.72	1.54	no
1628	male	59	senior high school	173	55	69	18.38	current smokers	4.9	0.85	1.66	no
1629	male	48	primary school	173	76	80	25.39	previous smokers	5.47	0.52	1.14	no
1630	male	22	junior high school	175	65	78	21.22	non-smokers	5.8	1.53	1.16	no
1631	male	66	primary school	156	63.1	86	25.9	non-smokers	5.3	2.15	2.04	no
1632	male	50	junior high school	167.5	69.7	95	24.84	non-smokers	5.1	1.38	1.29	no
1633	male	64	junior high school	170	67.7	87	23.43	non-smokers	3.8	1.89	1.78	no
1634	male	34	university or higher	177	84.9	96	27.1	current smokers	4.3	1.68	1.64	no
1635	male	40	junior high school	176.5	86	100	27.61	current smokers	5.4	2.36	0.99	no
1636	male	33	primary school	173	89	99	29.74	current smokers	4.7	1.95	0.93	no
1637	male	46	senior high school	168	69	80	24.45	non-smokers	5.3	2.16	1.54	no
1638	male	44	primary school	161	48	71	18	non-smokers	5.5	0.9	1.75	no
1639	male	42	junior high school	171.5	69.2	89.5	23.53	current smokers	5.1	4.55	0.74	no
1640	male	31	junior high school	170.5	58.8	71	20.23	current smokers	5.3	0.79	1.4	no
1641	male	48	junior high school	156	57	74	23.42	current smokers	5.2	0.87	1	no
1642	male	46	junior high school	173	69	90	23.05	current smokers	5.6	1.85	0.54	no
1643	male	48	senior high school	161.5	76.8	88	29.45	non-smokers	5.5	1.11	1.83	no
1644	male	40	junior high school	165	63	90	23.14	current smokers	6.3	2.03	0.98	no
1645	male	48	primary school	161.5	76.9	91	29.48	current smokers	4.6	0.94	1.84	no
1646	male	49	primary school	165.5	57.9	76	21.14	current smokers	5	1.18	1.28	no
1647	male	53	junior high school	163.5	58.2	71	21.77	current smokers	5.6	2.1	1.6	no
1648	male	43	illiteracy	158	50.1	77	20.07	current smokers	4.7	0.59	1.62	no
1649	male	26	university or higher	169	51	61	17.86	non-smokers	4.6	1.69	3.15	no
1650	male	39	junior high school	166	65.2	78	23.66	non-smokers	5.9	2.63	1.33	no
1651	male	44	junior high school	178	86.5	97	27.3	current smokers	5.6	1.45	1.05	no
1652	male	49	junior high school	169	63	70	22.06	current smokers	5.1	2.61	1.74	no
1653	male	47	junior high school	170	65	85	22.49	previous smokers	5.3	0.63	2.21	no
1654	male	60	primary school	171	66	75	22.57	current smokers	5.4	2.28	1.25	no
1655	male	40	senior high school	175.5	68	75	22.08	current smokers	4.8	1.44	1.38	no
1656	male	76	senior high school	168	58	76	20.55	non-smokers	5.5	1.51	1.76	no
1657	male	45	junior high school	166	64.5	87	23.6	current smokers	4.6	1.87	1	no
1658	male	36	junior high school	170	65	75	22.49	current smokers	5.2	1.66	0.9	no
1659	male	26	primary school	174.5	63.8	85	20.95	non-smokers	4.8	1	1.16	no
1660	male	52	junior high school	174	72.7	89	24	current smokers	5.2	1.7	1.23	no
1661	male	16	junior high school	172	57.5	74	19.4	non-smokers	5	6.89	1.8	no
1662	male	36	primary school	169	72.4	92.4	25.35	current smokers	4.7	0.75	1.39	no
1663	male	47	junior high school	164	75	86	27.89	current smokers	5.4	3.45	1	no
1664	male	20	university or higher	170	49.9	65	17.2	current smokers	5.3	1.48	1.67	no
1665	male	18	primary school	167.5	48.7	67	17.36	non-smokers	4.9	0.43	1.38	no
1666	male	44	junior high school	166	60.5	76	21.96	current smokers	4.6	1	1.33	no
1667	male	32	senior high school	149.6	68.3	86	30.52	non-smokers	7.6	2.4	0.8	no
1668	male	43	junior high school	172	70	82	23.66	current smokers	5.4	1.74	1.65	no
1669	male	45	junior high school	165	63.2	82	23.21	current smokers	5.5	1.49	1.58	no
1670	male	25	junior high school	174.5	76.2	90	25.02	non-smokers	5.2	4.06	1.64	no
1671	male	56	junior high school	164.5	71.8	75	26.53	non-smokers	5	1.19	1.16	no
1672	male	52	primary school	171	83.5	94	28.56	current smokers	3.6	1.04	1.82	no
1673	male	40	junior high school	175	69	78	22	current smokers	5.6	0.96	1.86	no
1674	male	61	junior high school	159	80	87	31.64	non-smokers	5.1	0.7	1.33	no
1675	male	54	senior high school	168	72	85	25.51	current smokers	4.9	13	3.91	no
1676	male	21	university or higher	180	88	88	27.16	non-smokers	5.3	1.1	1.88	no
1677	male	41	junior high school	169.5	86	98	29.93	current smokers	5.6	4.04	0.92	no
1678	male	38	junior high school	167.5	79	100	28.16	non-smokers	4.6	1.17	1.03	no
1679	male	54	senior high school	178	80.7	97	25.47	non-smokers	6.9	1.81	6.7	no
1680	male	63	primary school	147	51	80	23.6	non-smokers	4.4	1.11	1.63	no
1681	male	28	junior high school	175	62	85	20.24	current smokers	4.9	1.34	1.22	no
1682	male	57	primary school	166	69	81	25.04	non-smokers	5.8	1.24	1.28	no
1683	male	42	junior high school	161	74	84	28.55	current smokers	5	1.2	2.42	no
1684	male	46	junior high school	176.5	56.7	74	18.2	current smokers	4.2	0.92	1.52	no
1685	male	49	junior high school	168	67.4	81	23.88	current smokers	4.6	0.47	1.16	no
1686	male	75	primary school	175	72	87	23.51	current smokers	5.8	0.92	0.98	no
1687	male	36	senior high school	184	97.5	103	28.8	non-smokers	5.7	6.4	1.12	no
1688	male	60	primary school	176.5	80.7	93	25.91	current smokers	4.6	1.48	1.84	no
1689	male	42	junior high school	173	65	98	21.72	current smokers	5.2	1.43	0.74	no
1690	male	86	university or higher	158.5	60.9	96	24.24	non-smokers	4.6	1.48	0.97	no
1691	male	58	illiteracy	165	68.8	92	25.27	non-smokers	5.3	2.41	0.9	no
1692	male	45	primary school	175	95	109	31.02	current smokers	4.6	1.38	2.14	no
1693	male	45	junior high school	169	76	86	26.61	non-smokers	5	1.38	1.04	no
1694	male	53	junior high school	161	51	77	19.68	current smokers	4.5	0.78	1.48	no
1695	male	72	junior high school	165.5	44.4	80	16.21	current smokers	6.8	1	1.81	no
1696	male	30	junior high school	176.5	87.5	98	28.09	current smokers	4.8	2.2	0.92	no
1697	male	44	junior high school	171	76.1	93	26.03	current smokers	4.5	1.28	1.19	no
1698	male	59	primary school	174	78	83	25.76	non-smokers	3.9	1.2	1.26	no
1699	male	38	junior high school	165	71	85	26.08	non-smokers	5.3	0.54	1.75	no
1700	male	50	senior high school	166.5	77.9	95	28.1	current smokers	5.6	3.15	1	no
1701	male	41	senior high school	170	63.5	74	21.97	current smokers	5.2	1.44	1.62	no
1702	male	17	junior high school	171	69.7	75	23.84	non-smokers	4.8	0.56	0.85	no
1703	male	37	primary school	167	100	120	35.86	current smokers	6.1	1.37	2.47	no
1704	male	56	senior high school	170	61	80	21.11	previous smokers	4.5	1.92	1.26	no
1705	male	75	primary school	170	67	79	23.18	non-smokers	5.6	0.66	0.95	no
1706	male	49	primary school	169	86	92	30.11	previous smokers	5	3.59	0.9	no
1707	male	48	primary school	170	63.3	78	21.9	non-smokers	6	0.7	1.84	no
1708	male	20	university or higher	176	54.4	64	17.56	current smokers	4.9	0.71	1.08	no
1709	male	61	junior high school	169	95	105	33.26	current smokers	5.1	1.37	0.89	no
1710	male	29	junior high school	171	80.3	90	27.46	non-smokers	5.4	1.41	1.05	no
1711	male	57	primary school	175.5	74.5	87	24.19	current smokers	4.6	1.79	1.59	no
1712	male	79	junior high school	145	44	80	20.9	current smokers	5.1	0.77	2.01	no
1713	male	48	primary school	177	72	84	22.98	current smokers	5.7	1.47	1.81	no
1714	male	40	junior high school	179	95.6	100	29.84	non-smokers	4.8	0.84	1.19	no
1715	male	44	junior high school	174.5	58.9	91	19.34	current smokers	5.2	0.77	0.94	no
1716	male	47	junior high school	166.8	64	82	23	non-smokers	5.6	3.19	1.02	no
1717	male	39	junior high school	174	75	87	24.77	non-smokers	5.3	1.25	2.17	no
1718	male	46	primary school	172	59.4	80	20.08	previous smokers	5.1	1.12	1.74	no
1719	male	41	junior high school	175	89.5	99	29.22	non-smokers	5.1	4.48	0.8	no
1720	male	29	senior high school	185.5	87	93	25.28	current smokers	5.3	0.94	1.11	no
1721	male	75	primary school	163	69	82	25.97	previous smokers	5.6	1.92	3.04	no
1722	male	58	primary school	164	62.1	80	23.09	current smokers	5.2	0.8	1.11	no
1723	male	24	university or higher	172.5	70	72	23.52	non-smokers	5	0.9	1.38	no
1724	male	41	junior high school	167.5	60.7	73	21.64	current smokers	5.4	1.12	1.73	no
1725	male	63	primary school	162	57	74	21.72	current smokers	5.7	0.92	1.75	no
1726	male	51	junior high school	172	90	100	30.42	current smokers	4.7	0.99	1.14	no
1727	male	64	junior high school	163	54	72	20.32	current smokers	4.9	1.5	1.27	no
1728	male	42	junior high school	169.5	59.1	74	20.57	current smokers	5.7	0.38	1.4	no
1729	male	62	junior high school	160	59	79	23.05	current smokers	6	2.81	0.83	no
1730	male	38	junior high school	154	65.8	91	27.74	current smokers	4.9	3.01	4.12	no
1731	male	30	senior high school	176.5	89.9	99	28.86	non-smokers	4.9	1.8	1.14	no
1732	male	48	primary school	172	89.5	108	30.25	non-smokers	4.4	2.19	0.89	no
1733	male	75	primary school	156.4	51	84	20.9	non-smokers	5.9	1.32	1.17	no
1734	male	24	senior high school	183	79	86	23.59	current smokers	5.5	2.28	1.22	no
1735	male	41	junior high school	176	60.8	78	19.6	non-smokers	5	9.29	1.09	no
1736	male	30	senior high school	172	73	83	24.68	current smokers	4.7	1.36	1.03	no
1737	male	76	illiteracy	158	72	112	28.84	non-smokers	5.5	1.36	1.27	no
1738	male	44	junior high school	175	88	98	28.73	current smokers	5.2	0.94	1	no
1739	male	19	junior high school	175	69	88	22.5	current smokers	4.8	2.2	1.72	no
1740	male	70	primary school	165.5	85.9	104	31.36	previous smokers	7.9	3.23	0.82	no
1741	male	38	junior high school	179	86.6	89.5	27.03	current smokers	4.9	2.72	0.93	no
1742	male	53	junior high school	167	86.8	103	31.12	non-smokers	5.3	0.63	1.19	no
1743	male	50	junior high school	157	60	85	24.34	current smokers	5.3	1.81	0.84	no
1744	male	37	junior high school	175	69	89	22.53	current smokers	5.2	1.37	1.15	no
1745	male	50	primary school	175	91	88	29.71	non-smokers	3.9	1.5	2.36	no
1746	male	27	senior high school	179	70	74	21.85	current smokers	4.3	0.74	1.23	no
1747	male	58	junior high school	175	84	98	27.43	current smokers	4.4	0.96	0.93	no
1748	male	62	illiteracy	164.9	68.7	84	25.26	non-smokers	5.6	1.69	1.37	no
1749	male	47	junior high school	174	69	93	22.79	current smokers	4.6	1.49	1.5	no
1750	male	48	junior high school	162	76.5	93	29.15	previous smokers	5.7	3.01	1.66	no
1751	male	48	primary school	178.5	91.8	98.5	28.8	current smokers	5	2.12	0.94	no
1752	male	43	primary school	170	86.6	108	29.97	non-smokers	4.9	1.66	2.75	no
1753	male	55	junior high school	171	65	78	22.23	current smokers	5.3	1.95	1.2	no
1754	male	51	junior high school	169.5	65.5	79	22.8	current smokers	5.4	2	1.04	no
1755	male	64	junior high school	160	63	88	24.61	previous smokers	5.4	0.8	1.55	no
1756	male	70	primary school	176	74	82	23.8	current smokers	4.8	3.3	3.16	no
1757	male	53	junior high school	166	78	94	28.31	current smokers	5.4	1.72	1.1	no
1758	male	35	junior high school	166.5	76.5	93	27.6	current smokers	5.3	1.12	1.31	no
1759	male	21	junior high school	165	51.7	63	18.99	current smokers	5.1	0.9	1.49	no
1760	male	16	senior high school	176	61.3	69	19.79	non-smokers	5.3	0.7	1.64	no
1761	male	50	junior high school	166	91	109	33.02	current smokers	5.6	7.56	0.78	no
1762	male	35	junior high school	172	79	92	26.7	current smokers	5.7	3.02	0.99	no
1763	male	33	senior high school	177	81.5	89	26.01	non-smokers	4.7	1.53	1.17	no
1764	male	37	junior high school	178	84	104	26.51	non-smokers	6	2.9	3.1	no
1765	male	46	primary school	159	61	77	24.13	current smokers	5	2.35	1.31	no
1766	male	58	primary school	158	55	72	22.03	current smokers	5.8	1.03	2.15	no
1767	male	30	junior high school	165	61	78	22.41	previous smokers	3.7	0.62	1.63	no
1768	male	37	junior high school	177.5	77.4	80	24.57	current smokers	4.4	3.05	1.69	no
1769	male	52	junior high school	161.5	53.5	75	20.51	non-smokers	5.3	1.02	1.21	no
1770	male	40	junior high school	174.5	102.5	108	33.66	non-smokers	5.2	1.23	1.36	no
1771	male	45	junior high school	166	72	82	26.13	non-smokers	5.3	1.02	2.73	no
1772	male	43	junior high school	175	89	96	29.06	non-smokers	5.6	1.06	1.21	no
1773	male	64	primary school	177	80.5	97	25.7	non-smokers	5.2	1.31	1.2	no
1774	male	40	junior high school	171	70	86	23.94	current smokers	5.29	0.57	1.09	no
1775	male	48	junior high school	195	93	95	24.46	non-smokers	3.97	0.9	1.52	no
1776	male	55	senior high school	174	79	91	26.09	current smokers	5	1.68	4.15	no
1777	male	51	junior high school	171.5	69	90	23.46	non-smokers	4.3	0.9	1.06	no
1778	male	65	primary school	173	76.5	101	25.56	current smokers	4.6	1.26	2.77	no
1779	male	45	junior high school	166.5	85.5	101	30.84	non-smokers	5.3	1.42	1.14	no
1780	male	28	senior high school	177.5	80.1	102	25.42	non-smokers	4.7	1.7	1.49	no
1781	male	64	junior high school	165	55.7	81	20.46	non-smokers	5.3	1.03	0.9	no
1782	male	41	primary school	156	73.3	89	30.12	current smokers	5	4.79	2.47	no
1783	male	61	primary school	163	60	74	22.58	current smokers	5.4	1.18	4.61	no
1784	male	22	junior high school	177.4	61.2	80	19.45	non-smokers	4.7	1.01	1.11	no
1785	male	42	junior high school	170	57	75	19.72	current smokers	5.6	1.37	1.56	no
1786	male	63	junior high school	167.5	66.5	82	23.7	current smokers	5.1	4.89	0.91	no
1787	male	35	senior high school	163	65	83	24.46	current smokers	5.6	2.04	1.16	no
1788	male	32	junior high school	178	96.1	97	30.33	non-smokers	5.3	2.63	0.54	no
1789	male	25	junior high school	171.5	77.3	83	26.28	current smokers	5.2	1.62	0.98	no
1790	male	25	junior high school	177.5	66.8	73	21.2	non-smokers	5.4	0.9	1.49	no
1791	male	34	junior high school	172	99	107	33.46	previous smokers	4.1	3.1	0.67	no
1792	male	36	junior high school	167	58	80	20.8	current smokers	4.6	4.52	1.67	no
1793	male	27	junior high school	168.5	77.2	101	27.2	current smokers	4.5	1.58	1.47	no
1794	male	70	primary school	165	68	87	24.98	current smokers	4.6	0.92	2.48	no
1795	male	53	junior high school	165	70	84	25.71	current smokers	5.1	3.16	1.1	no
1796	male	43	junior high school	175.5	85.5	96	27.76	current smokers	5	5.28	1.72	no
1797	male	25	junior high school	181.5	64.4	77	19.55	current smokers	5.5	1.04	1.6	no
1798	male	39	university or higher	163	63	74	23.71	non-smokers	4.7	3.22	1.1	no
1799	male	26	primary school	177	99	99	31.6	current smokers	5.3	2.31	1.07	no
1800	male	47	primary school	173	73	88	24.39	non-smokers	5	11.68	0.66	no
1801	male	55	primary school	161.5	74.2	90	28.45	current smokers	5	2.12	1.19	no
1802	male	59	primary school	168.5	78.8	98	27.75	non-smokers	5.9	2.71	1.25	no
1803	male	66	primary school	153	61.2	93	26.1	current smokers	5.1	1.19	0.95	no
1804	male	47	primary school	167	92	105	32.99	non-smokers	5.1	1.04	0.94	no
1805	male	47	primary school	167	74	86	26.53	non-smokers	4.6	3.03	0.61	no
1806	male	20	senior high school	180.5	71.5	80	21.95	current smokers	4.6	1.21	1.34	no
1807	male	48	junior high school	183	95.6	99	28.55	current smokers	5.4	0.97	1.64	no
1808	male	39	primary school	156.5	63.6	79	25.97	non-smokers	5.2	3.26	1.15	no
1809	male	52	primary school	167	72.3	92	25.92	non-smokers	4.7	1.34	1	no
1810	male	38	junior high school	164	85	96	31.6	non-smokers	5.5	1.7	1.56	no
1811	male	51	primary school	157	42.7	69	17.3	non-smokers	5.3	1.69	1.37	no
1812	male	54	primary school	162	68.5	95	26.1	non-smokers	5.3	1.32	0.92	no
1813	male	40	junior high school	175.5	72.3	86.5	23.5	current smokers	5.3	2.28	1.76	no
1814	male	60	primary school	168.5	79.3	96	27.93	non-smokers	5.7	0.81	1.42	no
1815	male	57	senior high school	174	58	72	19.16	non-smokers	4.8	0.53	1.85	no
1816	male	62	primary school	170.5	77.5	88	26.66	non-smokers	5.4	0.7	2.1	no
1817	male	29	junior high school	179.5	78.4	90	24.33	current smokers	5.4	1.91	1.32	no
1818	male	46	senior high school	160	80	98	31.25	current smokers	5.1	0.98	1.99	no
1819	male	31	junior high school	181	82.9	90	25.3	current smokers	5.9	2.81	0.62	no
1820	male	59	junior high school	165.5	83.1	101	30.34	current smokers	5.6	1.41	1.07	no
1821	male	50	junior high school	166	75	93	27.22	previous smokers	4.8	2.52	1.07	no
1822	male	36	junior high school	171	66	93	22.6	current smokers	5.6	0.76	1.56	no
1823	male	68	primary school	175.5	80.7	101	26.2	non-smokers	4.6	2.07	1.39	no
1824	male	53	junior high school	168.5	59.9	75	21.1	current smokers	4.8	0.5	1.49	no
1825	male	61	junior high school	166	68	81	24.68	current smokers	6	3.38	1.09	no
1826	male	41	junior high school	178	87.2	98	27.52	current smokers	5.3	2.37	0.69	no
1827	male	52	junior high school	168	66	84	23.38	current smokers	5.3	2	1.36	no
1828	male	40	junior high school	161.5	69.5	87	26.7	current smokers	6.1	1.75	1.54	no
1829	male	74	primary school	167.5	70.6	88	25.16	non-smokers	3.7	1.12	1.1	no
1830	male	42	junior high school	164	58	71	21.56	current smokers	4.7	1.8	2.77	no
1831	male	47	senior high school	170	83	98	28.72	current smokers	5.3	1.55	1.43	no
1832	male	61	primary school	160	52	87	20.31	current smokers	5.9	1	1.74	no
1833	male	36	senior high school	171.5	74.5	74	25.33	current smokers	4.6	1.07	1.69	no
1834	male	77	primary school	161	72.3	89	27.89	non-smokers	5.7	1.78	1.78	no
1835	male	31	junior high school	180	98	110	30.25	current smokers	3.9	3.97	1.37	no
1836	male	34	primary school	172	57	71	19.27	current smokers	5.2	0.42	1.54	no
1837	male	56	primary school	160	51.5	73	20.12	current smokers	4.4	1.14	3.15	no
1838	male	87	illiteracy	159.5	55.7	82	21.89	previous smokers	4.9	2.2	1.56	no
1839	male	59	junior high school	168	54	71	19.13	current smokers	4.8	0.69	1.64	no
1840	male	60	primary school	170	66	88	22.84	current smokers	5.7	1.77	1.32	no
1841	male	50	junior high school	169.5	77.2	96	26.87	non-smokers	4.9	2.46	1.12	no
1842	male	36	junior high school	172	75.1	90	25.39	current smokers	4.3	1.6	2.69	no
1843	male	61	primary school	164	70	87	26.03	previous smokers	5	2.04	1.1	no
1844	male	82	primary school	167	65	82	23.31	current smokers	5.3	4.27	2.53	no
1845	male	57	senior high school	172	76	92	25.69	non-smokers	5.3	1.27	2.04	no
1846	male	45	primary school	165	64.6	76	23.73	current smokers	5.6	1.2	1.67	no
1847	male	37	junior high school	176	81	96	26.15	non-smokers	5	0.92	1.08	no
1848	male	38	junior high school	178	87	89	27.46	current smokers	5.6	2.03	0.65	no
1849	male	66	primary school	170	70	85	24.22	non-smokers	5.3	1.49	1.79	no
1850	male	43	junior high school	176	98.9	104	31.93	current smokers	5.4	2.97	2.44	no
1851	male	19	junior high school	182	102	102	30.79	current smokers	4.4	0.92	1.66	no
1852	male	54	primary school	153	71.3	101	30.46	non-smokers	4.7	1.31	1.54	no
1853	male	23	university or higher	182	67	104	20.23	current smokers	4.4	1.56	1.58	no
1854	male	47	primary school	167	67	87	24.02	non-smokers	4	0.89	1.87	no
1855	male	47	junior high school	173	70.7	84	23.62	current smokers	5.2	2.32	1.12	no
1856	male	30	junior high school	165.5	71.3	88	26.03	previous smokers	4.8	2.09	1.06	no
1857	male	42	junior high school	178.5	88.4	97	27.74	non-smokers	5.4	1.44	0.91	no
1858	male	40	university or higher	175	87.5	99	28.57	current smokers	5.2	2.93	2.61	no
1859	male	19	junior high school	170	55	78	19.03	non-smokers	4.5	1.43	1.68	no
1860	male	45	junior high school	166	59.4	84.5	21.56	non-smokers	4.9	1.76	2.1	no
1861	male	48	junior high school	180	75	86	23.15	current smokers	4.9	1.27	2.44	no
1862	male	54	junior high school	169	64	78	22.41	previous smokers	5.7	2.08	1.4	no
1863	male	39	junior high school	176.5	73.5	89	23.59	current smokers	5.1	1.08	1.03	no
1864	male	36	university or higher	167	74	100	26.53	non-smokers	5	3.7	1.38	no
1865	male	20	junior high school	180	62	73	19.14	non-smokers	4.7	2.21	1.74	no
1866	male	19	senior high school	179	56	64	17.48	non-smokers	4.4	1.06	1.03	no
1867	male	40	junior high school	175	72.4	88	23.64	non-smokers	4.8	2.63	0.58	no
1868	male	34	junior high school	172.5	66.1	79	22.21	current smokers	6.1	0.73	1.49	no
1869	male	37	primary school	177.5	89.4	97	28.38	current smokers	5.1	1.83	2.47	no
1870	male	18	senior high school	176.5	56.8	76	18.23	non-smokers	5.6	0.64	1.52	no
1871	male	50	junior high school	176	63.4	78	20.47	current smokers	5.2	1.29	1.16	no
1872	male	45	junior high school	166	69	84	25.04	current smokers	5.3	2.29	2.15	no
1873	male	44	junior high school	171.5	85	102	28.9	non-smokers	3.6	2.75	1.68	no
1874	male	32	senior high school	172	78	89	26.37	current smokers	5.4	1	1.3	no
1875	male	45	primary school	182.5	86.4	99	25.94	current smokers	4.7	2.32	0.95	no
1876	male	45	junior high school	162	70	86	26.67	current smokers	5.4	2.61	1.82	no
1877	male	63	primary school	158	58	71	23.23	current smokers	4.5	1.91	1.03	no
1878	male	42	junior high school	168	70	78	24.8	current smokers	5.3	0.59	1.98	no
1879	male	25	senior high school	168	53	70	18.78	non-smokers	5.8	1.26	0.92	no
1880	male	60	primary school	170	71.8	94	24.84	previous smokers	4.9	1.29	1.35	no
1881	male	44	junior high school	171	88	100	30.09	non-smokers	5.1	3.85	0.87	no
1882	male	67	junior high school	151.5	59.9	84	26.1	non-smokers	6.1	1.28	1.11	no
1883	male	62	primary school	164.5	60.5	84	22.36	non-smokers	5.2	0.81	1.01	no
1884	male	37	primary school	172	68	89	22.99	current smokers	5.4	1.09	2.74	no
1885	male	51	primary school	171.5	78.1	99	26.55	non-smokers	5.4	1.4	1.29	no
1886	male	54	junior high school	175.5	83.6	99	27.1	current smokers	5.4	2.23	1.29	no
1887	male	39	junior high school	169	80.8	87	28.29	current smokers	4.6	1.37	0.88	no
1888	male	41	junior high school	171	88	103	30.09	current smokers	4.7	4.11	0.35	no
1889	male	44	junior high school	145	57.7	88	27.44	current smokers	4.8	0.7	1.17	no
1890	male	44	junior high school	165.5	79.4	102	28.99	current smokers	4.6	2.06	1.65	no
1891	male	51	primary school	169	83	97	29.06	non-smokers	5.7	1.69	1.68	no
1892	male	21	senior high school	173	68.5	80	23	non-smokers	5	1.29	1.14	no
1893	male	82	illiteracy	167	67	96	24.02	non-smokers	6.5	0.79	1.92	no
1894	male	38	junior high school	165	56	71	20.57	current smokers	4.8	2.19	0.71	no
1895	male	47	junior high school	169	62.9	78	22.02	current smokers	5.9	1.04	2.03	no
1896	male	29	senior high school	168	97	115	34.37	non-smokers	4.1	10.22	1.03	no
1897	male	46	primary school	174	71	87	23.45	current smokers	4.8	1.69	1.84	no
1898	male	54	primary school	161	82	105	31.63	non-smokers	5.9	0.88	1.38	no
1899	male	59	primary school	177	64	85	20.43	non-smokers	5.6	0.99	1.64	no
1900	male	54	primary school	163	86	100	32.37	current smokers	3.92	3.07	0.96	no
1901	male	51	junior high school	167.5	61.9	99	22.06	current smokers	4.7	6.16	1.63	no
1902	male	15	junior high school	173	72	86	24.06	non-smokers	5.7	1.45	1.23	no
1903	male	64	primary school	169.5	98.2	117	34.18	non-smokers	7.5	2.4	0.83	no
1904	male	50	junior high school	156	51.9	82	21.33	current smokers	5.2	1.47	3.12	no
1905	male	44	junior high school	182	82.2	85	24.82	non-smokers	4.8	1.61	4.75	no
1906	male	33	senior high school	185	105.1	102	30.71	current smokers	5.1	2.61	0.62	no
1907	male	23	senior high school	173.5	70.6	81	23.45	current smokers	5.3	1.18	0.95	no
1908	male	52	junior high school	167	65	85	23.31	current smokers	5.2	2.09	1.17	no
1909	male	56	primary school	174.5	77.3	93	25.39	current smokers	5.2	0.91	2.36	no
1910	male	69	junior high school	160	68	90	26.56	non-smokers	5	0.92	1.32	no
1911	male	54	junior high school	170	69	86	23.88	current smokers	4.8	1.33	1.22	no
1912	male	51	junior high school	171	66	81	22.57	current smokers	4.7	1.85	1.23	no
1913	male	74	junior high school	160.5	49	64	19.02	current smokers	5	1.19	1.74	no
1914	male	62	illiteracy	165	66.2	86	24.32	current smokers	5.4	0.58	1.28	no
1915	male	43	junior high school	173	79.6	89	26.6	non-smokers	6.2	0.83	1.46	no
1916	male	31	senior high school	182.5	69.8	85	20.96	current smokers	5.4	3.25	2.07	no
1917	male	62	junior high school	163.5	61.2	78	22.89	current smokers	5.1	0.38	3.55	no
1918	male	47	primary school	166	66	83	23.95	current smokers	5	0.91	1.41	no
1919	male	54	senior high school	168	69.7	89	24.7	non-smokers	5.5	1.52	1.02	no
1920	male	44	senior high school	167.5	78.3	92	27.91	current smokers	5.4	2.72	1.32	no
1921	male	16	senior high school	185	65	78	18.99	non-smokers	4	1.04	1.62	no
1922	male	39	junior high school	167	65	82	23.31	non-smokers	2.7	1.66	0.66	no
1923	male	42	junior high school	169	71	83	24.86	non-smokers	5	0.81	2.15	no
1924	male	43	senior high school	173	82.7	98	27.63	non-smokers	5.1	2.63	0.84	no
1925	male	40	junior high school	171.5	67.2	84	22.85	current smokers	5.1	1.07	1.26	no
1926	male	50	junior high school	168	58.9	80	20.87	current smokers	5.5	1.2	1.68	no
1927	male	48	junior high school	170	75	89	25.95	current smokers	5.1	2.16	1.14	no
1928	male	25	senior high school	173	85	95	28.4	current smokers	4.4	2.98	1.58	no
1929	male	35	junior high school	174	84	93	27.74	current smokers	5.6	1.68	1.83	no
1930	male	54	primary school	169	81	97	28.36	current smokers	5.8	1.88	1.75	no
1931	male	63	illiteracy	172	72	81	24.34	previous smokers	5	0.55	1.57	no
1932	male	37	junior high school	180	66	86	20.37	non-smokers	3.8	0.9	1.76	no
1933	male	52	primary school	179.5	81.2	95	25.2	non-smokers	4.8	1.01	1.43	no
1934	male	20	junior high school	170	71	92	24.57	non-smokers	4.8	1.35	1.1	no
1935	male	51	junior high school	169.5	76.1	89	26.49	current smokers	5.4	3.06	0.52	no
1936	male	39	junior high school	171	66.5	83	22.74	previous smokers	4.9	2.22	0.79	no
1937	male	43	senior high school	172	65	78	21.97	non-smokers	5.6	3.36	2.33	no
1938	male	21	junior high school	183	74	89	22.1	non-smokers	5.4	0.68	1.53	no
1939	male	43	primary school	178	87.4	90	27.58	non-smokers	5.1	1.63	1.12	no
1940	male	52	primary school	175	60.8	83	19.85	current smokers	5.2	1.31	1	no
1941	male	66	primary school	165	58	99	21.3	non-smokers	4.6	0.95	1.69	no
1942	male	28	senior high school	161.5	61.8	74	23.69	current smokers	5	1.35	1.17	no
1943	male	58	illiteracy	166	79.1	103	28.71	current smokers	5.2	2.57	0.61	no
1944	male	47	junior high school	171.5	81.1	88	27.57	current smokers	5.5	2.1	0.62	no
1945	male	43	junior high school	164.5	64.3	82	23.76	non-smokers	5.1	3.47	0.68	no
1946	male	68	primary school	165	79	90	29.02	non-smokers	3.8	0.69	1.5	no
1947	male	42	senior high school	178	71.2	85	22.5	current smokers	4.9	6.55	1.64	no
1948	male	28	junior high school	136	37	70	20	current smokers	3.9	0.96	1.73	no
1949	male	45	junior high school	160	73	83	28.52	non-smokers	5.9	1.27	1.39	no
1950	male	22	university or higher	170	70	79	24.22	current smokers	4.7	0.99	1.62	no
1951	male	50	primary school	168	95.2	114	33.73	previous smokers	5	3.18	0.7	no
1952	male	39	junior high school	172.5	75.3	83	25.31	non-smokers	5.6	0.89	1.69	no
1953	male	19	senior high school	167	54.3	68	19.47	non-smokers	5.5	0.85	0.95	no
1954	male	41	junior high school	166	82.6	102	29.98	current smokers	3.6	1.35	1.69	no
1955	male	50	junior high school	174	82	93	27.08	current smokers	6.4	2.81	1.06	no
1956	male	47	primary school	165	77	90	28.28	current smokers	5.3	0.85	1.03	no
1957	male	46	junior high school	169.5	85.3	102	29.69	current smokers	5.5	5.7	0.51	no
1958	male	30	primary school	180	85	93	26.23	non-smokers	4.4	6.66	1.68	no
1959	male	70	primary school	164	63	86	23.42	non-smokers	4.1	2.54	1.92	no
1960	male	50	junior high school	161	80.3	99	30.98	non-smokers	5	2.68	3.15	no
1961	male	27	university or higher	180	75	96	23.15	non-smokers	3.6	1.38	1.32	no
1962	male	73	junior high school	167	67	94	24.02	current smokers	5.7	1.52	1.18	no
1963	male	47	junior high school	166	74	82	26.85	non-smokers	5.9	0.71	1.87	no
1964	male	34	junior high school	180	72	92	22.22	non-smokers	5.2	1.95	1.04	no
1965	male	36	junior high school	180	80	110	24.69	non-smokers	5.2	1.26	1.3	no
1966	male	53	primary school	173	77	91	25.73	non-smokers	5.8	0.84	1.89	no
1967	male	46	primary school	170	90	113	31.14	current smokers	5.6	3.44	1.85	no
1968	male	71	illiteracy	160	56	80	21.88	current smokers	4.8	2.52	1.31	no
1969	male	43	junior high school	175.5	67.5	76	21.92	current smokers	5.3	1.78	1.95	no
1970	male	45	primary school	170	77.4	90	26.78	non-smokers	6.3	0.92	1.79	no
1971	male	43	primary school	168.5	70.9	88	24.97	current smokers	5.9	1.67	1.35	no
1972	male	51	primary school	178	65	79	20.52	current smokers	5	1.32	1.63	no
1973	male	45	junior high school	176	68	88	21.95	current smokers	4.7	3.29	1.07	no
1974	male	48	primary school	177	73	90	23.3	non-smokers	4.9	1.07	1.83	no
1975	male	68	primary school	175	66	99	21.55	current smokers	5.9	0.76	0.95	no
1976	male	64	primary school	165	65	80	23.88	current smokers	3.8	2.52	1.78	no
1977	male	54	junior high school	183.5	87.4	95	25.96	current smokers	5.8	3.51	0.93	no
1978	male	15	junior high school	182	73	88	22.04	non-smokers	4	5.06	0.77	no
1979	male	31	university or higher	168	77	82	27.28	non-smokers	4.7	0.88	1.93	no
1980	male	22	senior high school	180	85	97	26.23	non-smokers	5.6	0.67	1.69	no
1981	male	60	junior high school	160	55	70	21.48	current smokers	5.5	1.64	1.4	no
1982	male	49	junior high school	168	80	89	28.34	current smokers	5.6	1.58	1.26	no
1983	male	62	junior high school	166	72	87	26.13	non-smokers	5.7	4.1	2.32	no
1984	male	47	primary school	172.5	92.5	102	31.09	previous smokers	7.5	3.26	3.15	no
1985	male	73	illiteracy	155.5	49.5	73	20.47	non-smokers	5.1	0.97	1.43	no
1986	male	35	junior high school	154	64.1	93	27.03	non-smokers	5.6	5.77	3.78	no
1987	male	70	illiteracy	154	47	74	19.82	non-smokers	4.6	1.23	0.88	no
1988	male	74	junior high school	151	40.4	61	17.72	non-smokers	5.7	1.37	2.33	no
1989	male	57	primary school	175	84	99	27.43	previous smokers	5.4	1.63	1.11	no
1990	male	60	junior high school	171.5	80.9	101	27.51	previous smokers	4.9	1.32	1.18	no
1991	male	43	senior high school	176.5	92.3	104	29.63	non-smokers	5.2	1.77	0.95	no
1992	male	31	junior high school	183	88	93	26.28	current smokers	4.9	2.13	1.1	no
1993	male	27	university or higher	169.5	64.1	86	22.31	non-smokers	5	1.28	1.63	no
1994	male	30	senior high school	169	56	74	19.61	non-smokers	5	0.55	1.52	no
1995	male	39	primary school	181	71.3	80	21.76	non-smokers	4.8	1.7	1.81	no
1996	male	72	primary school	155	52	60	21.64	non-smokers	4.8	1.09	0.98	no
1997	male	51	junior high school	179.5	84.8	66	26.32	non-smokers	5.4	5.89	1	no
1998	male	29	junior high school	170	73.6	88	25.47	non-smokers	5	0.93	0.98	no
1999	male	43	primary school	160	62.1	84	24.26	previous smokers	5.7	1.13	2.49	no
[truncated: 213,652+ more rows]

## Sheet: Sheet1
				1902	7967	9869
				7064	39225	46289
				9746	65122	74868
				5519	39784	45303
				2922	27580	30502
				764	8045	8809
				27917	187723	11
